# Supplementary material for: Analyzing fidelity and reproducibility of DNA templated plasmonic nanostructures
Source: Royal Society of Chemistry journal article supplement (doi:10.1039/c9nr03711j), 2019-01-01
Supplement: c9nr03711j1.pdf [file c9nr03711j1.pdf]

## Supporting Information:

### Analyzing fidelity and reproducibility of DNA templated plasmonic nanostructures

Divita Mathur,<sup>†,a,d</sup> William P. Klein,<sup>†,a,c</sup> Matthew Chiriboga,<sup>a,e</sup> Hieu Bui,<sup>a,c</sup> Eunkeu Oh,<sup>b,f</sup> Rafaela Nita,<sup>a,c</sup> Jawad Naciri,<sup>a</sup> Paul Johns,<sup>a,g</sup> Jake Fontana,<sup>a</sup> Sebastián A. Díaz,<sup>a</sup> and Igor L. Medintz<sup>a\*</sup>

---

<sup>a</sup> Center for Bio/Molecular Science and Engineering Code 6900, and

<sup>b</sup> Optical Sciences Division Code 5600, U.S. Naval Research Laboratory, 4555 Overlook AV SW, Washington, DC 20375, USA.

<sup>c</sup> National Research Council, 500 5<sup>th</sup> St NW, Washington, DC 20001, USA.

<sup>d</sup> College of Science and

<sup>e</sup> Department of Bioengineering, Institute for Advanced Biomedical Research, George Mason University, Fairfax, VA 22030, USA.

<sup>f</sup> KeyW Corporation, Hanover, MD 21076, USA.

<sup>g</sup> American Society for Engineering Education, 1818 N Street NW, Suite 600, Washington, DC 20036, USA.

<sup>†</sup> Authors contributed equally.

\* [igor.medintz@nrl.navy.mil](mailto:igor.medintz@nrl.navy.mil)

## Supporting Information S1: DNA origami nanostructures

### DNA triangle design

The DNA origami triangle is based on the original design by Paul Rothemund.<sup>1</sup> **Figure S1** shows a two-dimensional caDNAno<sup>2</sup> rendering of the DNA triangle wherein each side is designated as A, B, or C, and the staple strands within each side are assigned a number. Staple strands are addressed by the side+number; for example, A08 is staple 8 in side A. All the staple strands required to form the DNA triangle are listed in **Table S1**.

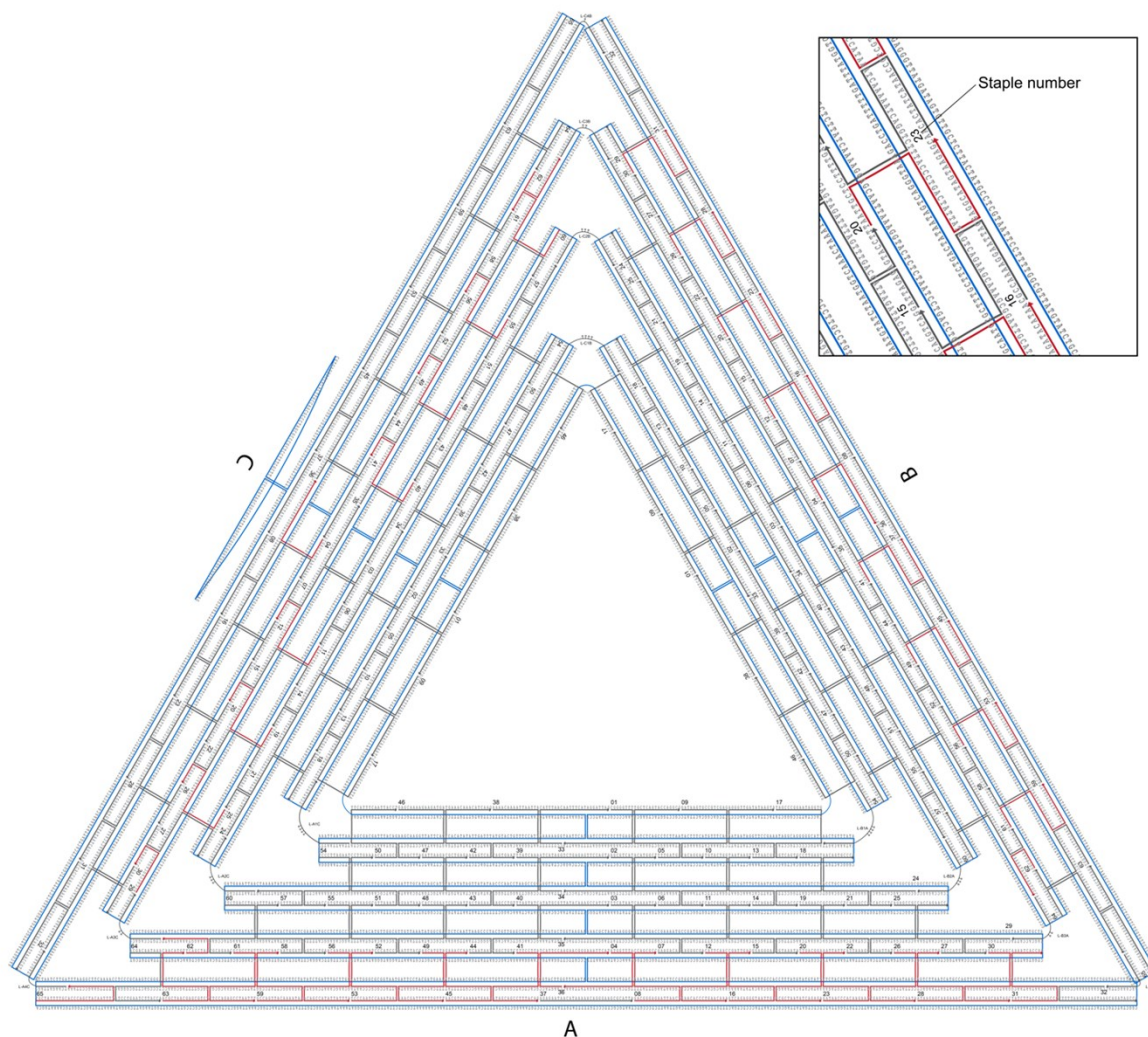

**Figure S1:** A high-resolution caDNAno rendering of the DNA Triangle. The scaffold strand is shown in blue while the staple strands are in grey or red. Red staple strands represent modified strands that were substituted with either AuNR/AuNP capture strands or bridge strands to form the DNA rhombus. Each side is designated A, B, or C, and the staple strands are numbered along each side; sequences of which can be found in **Table S1**.

### DNA rhombus design

The DNA rhombus is formed by bridging two DNA triangles using bridge staple strands (Table S2). The bridge staple strands bring together side B on each triangle, thus sides A and C form the outer edges of the rhombus with diagonal symmetry (sides A of each triangle are diagonally opposite to each other), as shown in Figure S2.

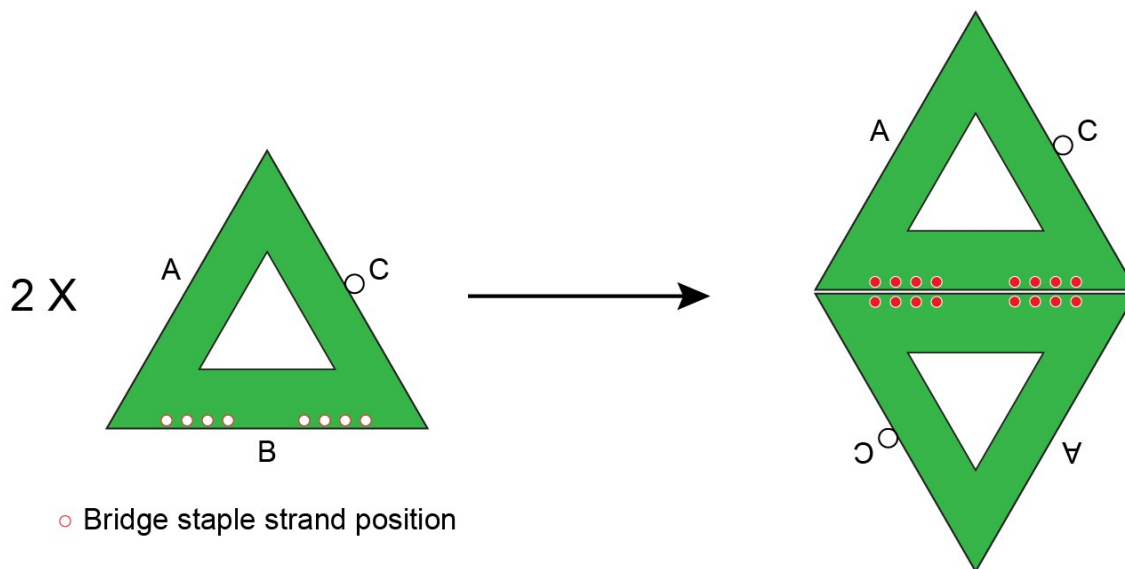

**Figure S2:** Schematic representing the formation process of the DNA rhombus from the DNA triangle. Eight staple strands along side B were replaced with bridge staple strands that allow the joining of two identical triangles.

## Supporting Information S2: DNA nanostructure FPLC purification

### DNA triangle purification by FPLC

Scaling up of the production of AuNR-DNA nanostructure complexes required the synthesis of large quantities of DNA origami triangle, made possible by FPLC-based purification. DNA origami triangle and rhombus were assembled on the order of 40 to 120 pmoles. The volume of assembled nanostructure was reduced to 200 to 500  $\mu$ L using Amicon ultracentrifugation spin columns (100 kDa MWCO), followed by FPLC elution. FPLC running buffer was 50 mM HEPES 4.5 mM  $MgCl_2$  250 mM NaCl and the flow rate was set to 0.5 mL/min. **Figure S3** shows an FPLC absorbance spectrum and fraction collection profile of the DNA triangle. The first peak to be eluted represents the formed DNA origami triangle whereas the second wider peak represents excess staple strands. Fractions corresponding to the nanostructure were collected, combined, and buffer exchanged back to the working buffer conditions (50 mM HEPES 9 mM  $MgCl_2$ ) using Amicon ultracentrifugation filter columns (100 kDa MWCO).

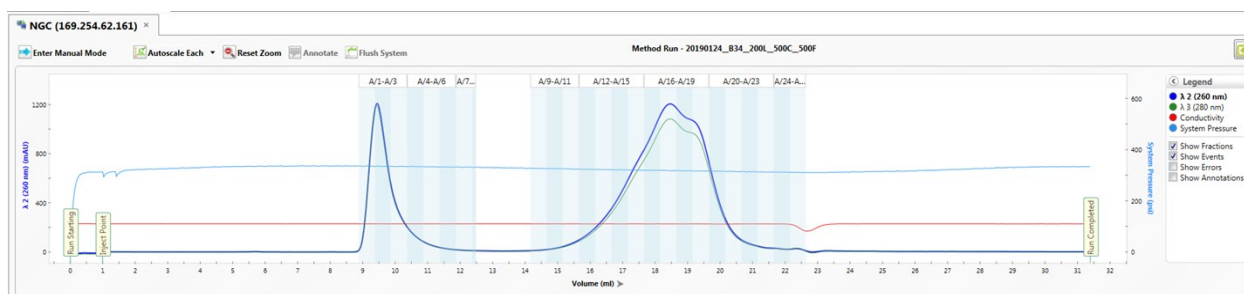

**Figure S3:** Absorbance spectra generated during FPLC fraction collection of the DNA triangle. The x-axis represents elution volume over time and the y-axis represents absorbance (mAU) at 260 nm. The FPLC was programmed to collect fractions (A/1, A/2,...) of elution absorbance of  $> 10$  mAU, shown as dark and light blue vertical bands. After the completion of the program, fractions A1-A3 were collected and combined to recover the formed DNA triangle whereas the remaining fractions, representing excess staple strands, were discarded.

### DNA rhombus purification by FPLC

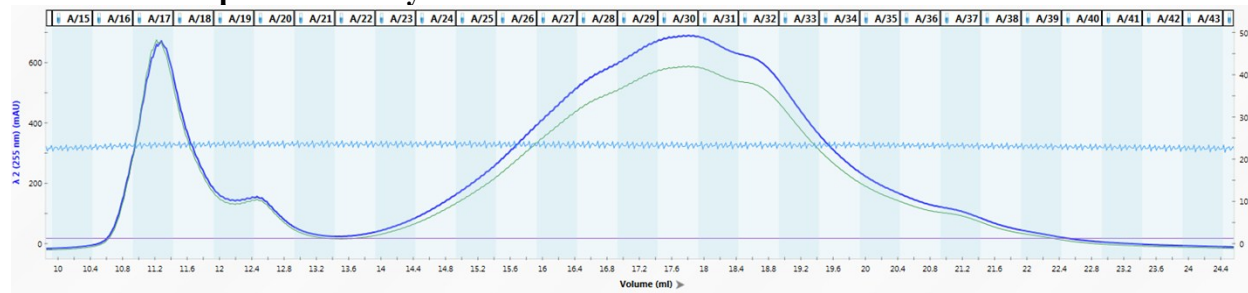

**Figure S4:** Absorbance spectra generated during FPLC fraction collection of the DNA rhombus. The x-axis represents elution volume over time and the y-axis represents absorbance (mAU) at 255 nm. The FPLC was programmed to collect fractions (A/1, A/2,...) shown as dark and light blue vertical bands. After the completion of the program, fractions corresponding to the first peak (A16-A18 in this example) were collected and combined to recover the formed DNA rhombus whereas the remaining fractions, representing single triangles and excess staple strands, were discarded.

## Supporting Information S3: AuNP and AuNR synthesis

### AuNP synthesis

Gold nanoparticles stabilized with sodium citrate with a diameter of 10 nm were synthesized following published procedures with some modifications.<sup>3</sup> Briefly, 200  $\mu\text{L}$  ( $2.0 \times 10^{-5}$  mol) of 0.1 M tetrachloroauric (III) acid ( $\text{HAuCl}_4 \cdot 3\text{H}_2\text{O}$ ) aqueous stock solution was mixed with 50  $\mu\text{L}$  ( $1.0 \times 10^{-5}$  mol) of 0.2 M of sodium citrate dihydrate stock solution in 50 mL of deionized  $\text{H}_2\text{O}$  under vigorous stirring. After 1 min of stirring the mixture, 400  $\mu\text{L}$  ( $4.0 \times 10^{-5}$  mol) of 0.1 M cold sodium borohydride ( $\text{NaBH}_4$ ) stock solution in deionized water was added quickly to the reaction mixture and kept at room temperature for the next 3 hours to complete the reaction. NP concentration was determined.<sup>4-6</sup> The final NP sizes were confirmed by TEM measurement.

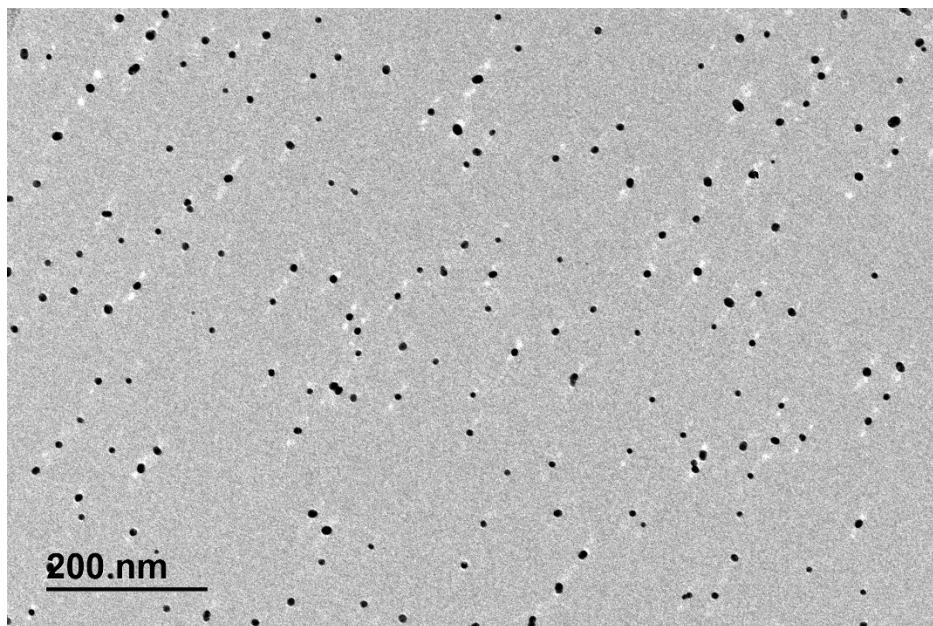

Figure S5: Representative TEM image of 10 nm AuNPs.

### AuNR synthesis

The 10x90 nm AuNRs were synthesized by a modified seed mediated growth process in CTAB/BDAC solutions in the presence of  $\text{HAuCl}_4$ , as reported previously.<sup>7</sup> The 20 X 50 nm AuNRs were prepared following the seed mediated method as described earlier.<sup>8</sup>

### Purification of the DNA functionalized AuNP and AuNR

After functionalization, the thiol-DNA-AuNR solution was subjected to centrifugation at 9,000 *ref* for 30 min at 20°C. The supernatant containing unbound thiol-DNA was discarded and the pellet was collected and transferred to a 2 mL vial. 80% glycerol solution (gel loading solution) was added to the AuNR pellet to bring to a final concentration of ~40%. This solution was loaded into a 0.8% agarose gel in 1X TBE (pH 8.4) and subjected to electric current at 100-120 V/cm for 2-3 h. **Figure S6** shows the result of gel electrophoresis on 20 X 50 nm AuNR functionalized with

A-seq thiolated-DNA. The band representing functionalized AuNR was then excised and extracted using parafilm-coated glass slides.

### Gel purification of AuNRs

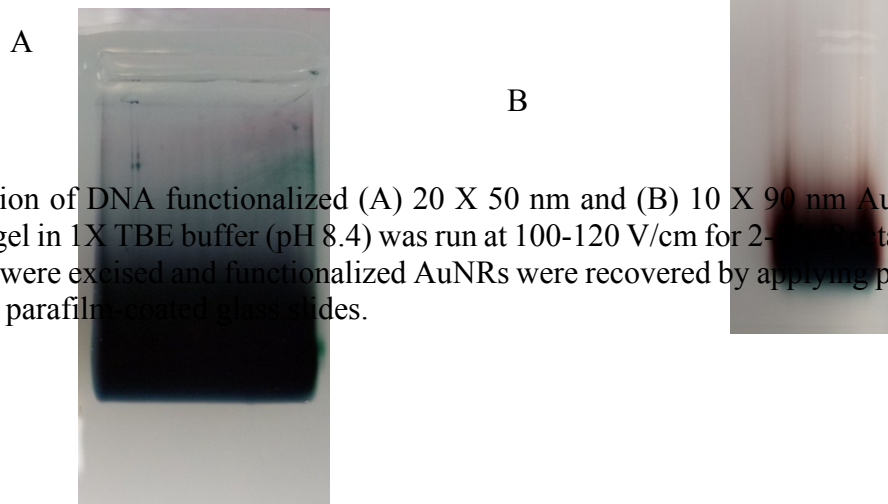

**Figure S6:** Purification of DNA functionalized (A) 20 X 50 nm and (B) 10 X 90 nm AuNR by AGE. 0.8% agarose gel in 1X TBE buffer (pH 8.4) was run at 100-120 V/cm for 2-3 hours. Rectangular regions marked here were excised and functionalized AuNRs were recovered by applying pressure on gel band between parafilm-coated glass slides.

### Magnesium Screening test on functionalized 20 X 50 nm AuNRs

We included the magnesium screening in the standard protocol in order to determine functionalized AuNR stability in the presence of  $Mg^{2+}$ , an important component in DNA origami stability.<sup>9</sup> The screening was conducted by adding 1  $\mu$ L of the functionalized AuNRs to a series of  $MgCl_2$  droplets ( $\sim 30$   $\mu$ L) with an increasing amount of  $MgCl_2$ , typically in the range of 0 mM to 500 mM. Characterization of stability was based on a visual change in the color of the droplets (Figure S6). Grey to clear droplets indicated that the AuNRs had crashed or aggregated and were not stable at that particular  $MgCl_2$  concentration. Only DNA-functionalized AuNRs stable at a minimum of 50 mM  $MgCl_2$  were further used in the experiments. Even though the  $MgCl_2$  concentration typically used for DNA nanostructure stability does not exceed 20 mM, in our experience, the threshold of 50 mM in the magnesium screening ensured consistent and high attachment yields.

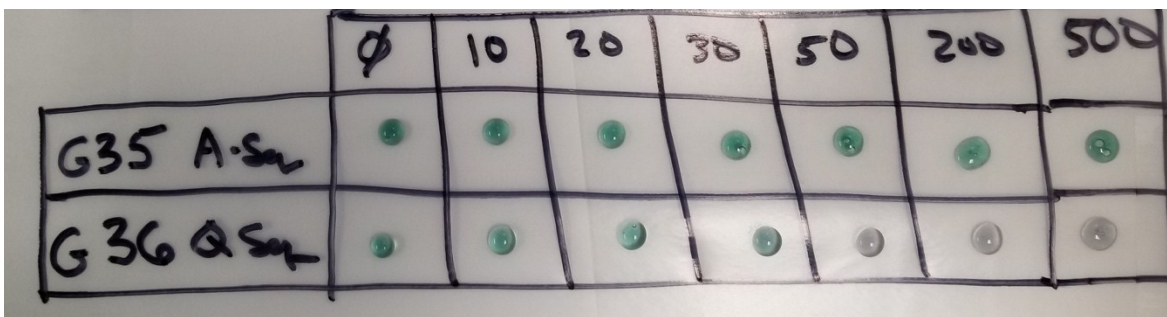

**Figure S7:** Magnesium screening of 20 X 50 nm AuNRs functionalized with A-seq or Q-seq. Each droplet of liquid shown here represents 1  $\mu$ L of AuNR mixed in 30  $\mu$ L of  $MgCl_2$  at various concentrations. The columns represent  $MgCl_2$  concentration (mM). Change of color to grey in case of batch “G36” Q-seq indicates loss of stability.

## Supporting Information S4: Purification of NP-DNA origami constructs

### AGE purification of ETE DNA triangle-AuNR constructs

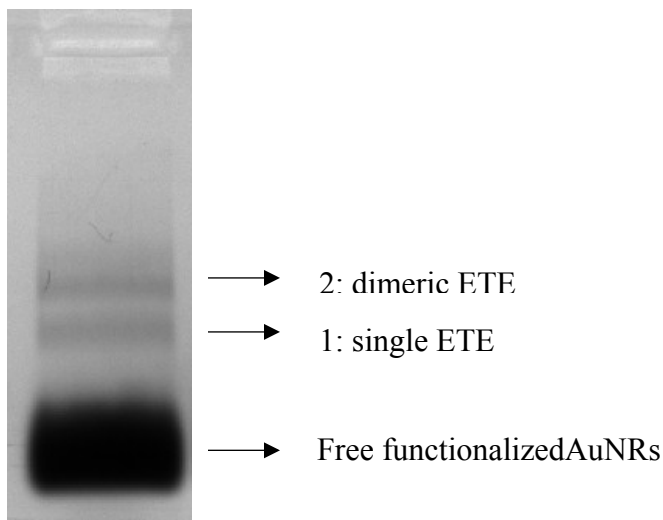

**Figure S8:** Purification of AuNR-DNA triangle ETE structures by AGE. Gel separation resulted in three primary products shown here as three distinct gel bands. The fastest band represents excess unbound functionalized AuNRs whereas the slowest and middle bands represent ETE dimeric and single triangle constructs, respectively. Gel conditions: 0.8% agarose gel in 50 mM HEPES 9 mM MgCl<sub>2</sub>, run at 70-80 V/cm at 4°C in an ice bath.

### AGE purification of RPR DNA triangle-AuNR constructs

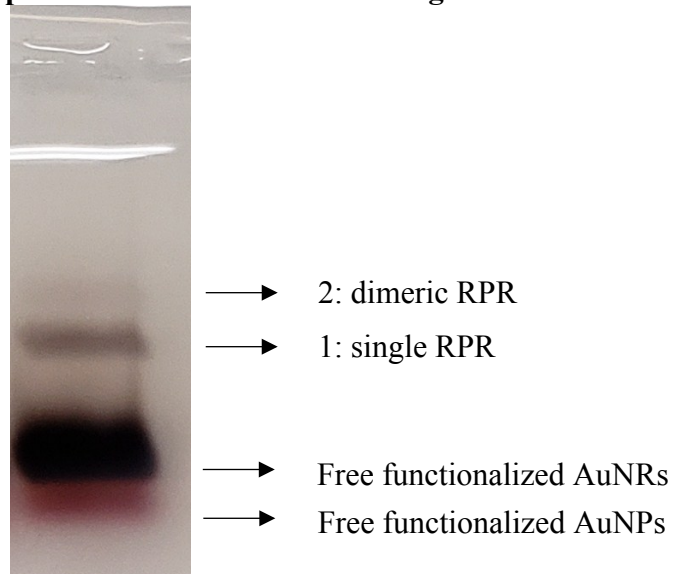

**Figure S9:** Purification of AuNR-DNA triangle RSR structures by AGE. Gel separation resulted in four primary products shown here as three distinct gel bands. The fastest band represents excess unbound functionalized AuNPs whereas the slowest and second bands represent RPR dimeric and single triangle constructs, respectively. Gel conditions: 0.8% agarose gel in 50 mM HEPES 9 mM MgCl<sub>2</sub>, run at 70-80 V/cm at 4°C in an ice bath.



## Supporting Information S5: AFM images of each configuration

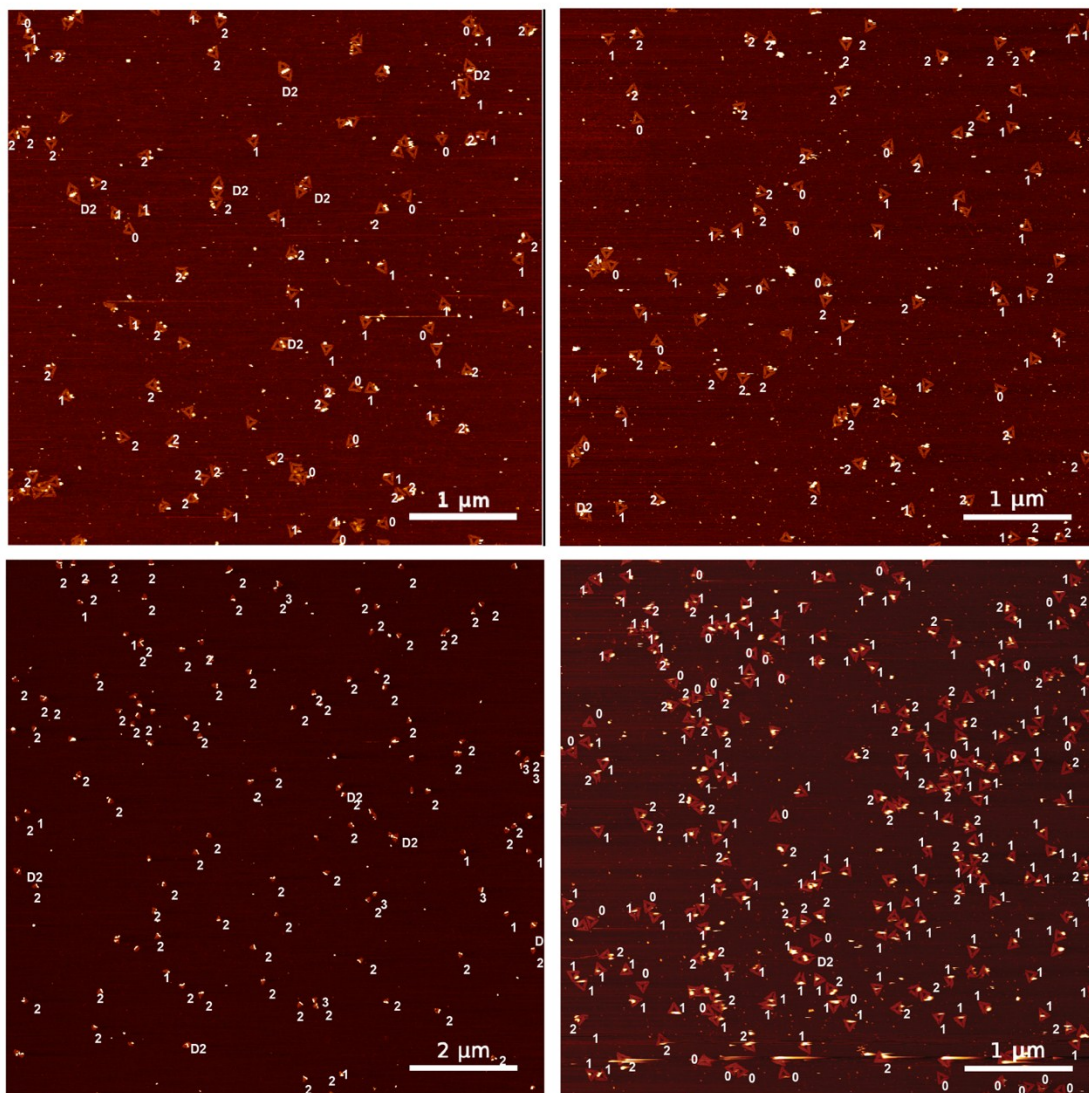

**Figure S10:** Representative AFM images of 20 X 50 nm AuNR ETE single DNA triangle construct, including particle count analysis, the summary of which is shown in main text Figure 3.

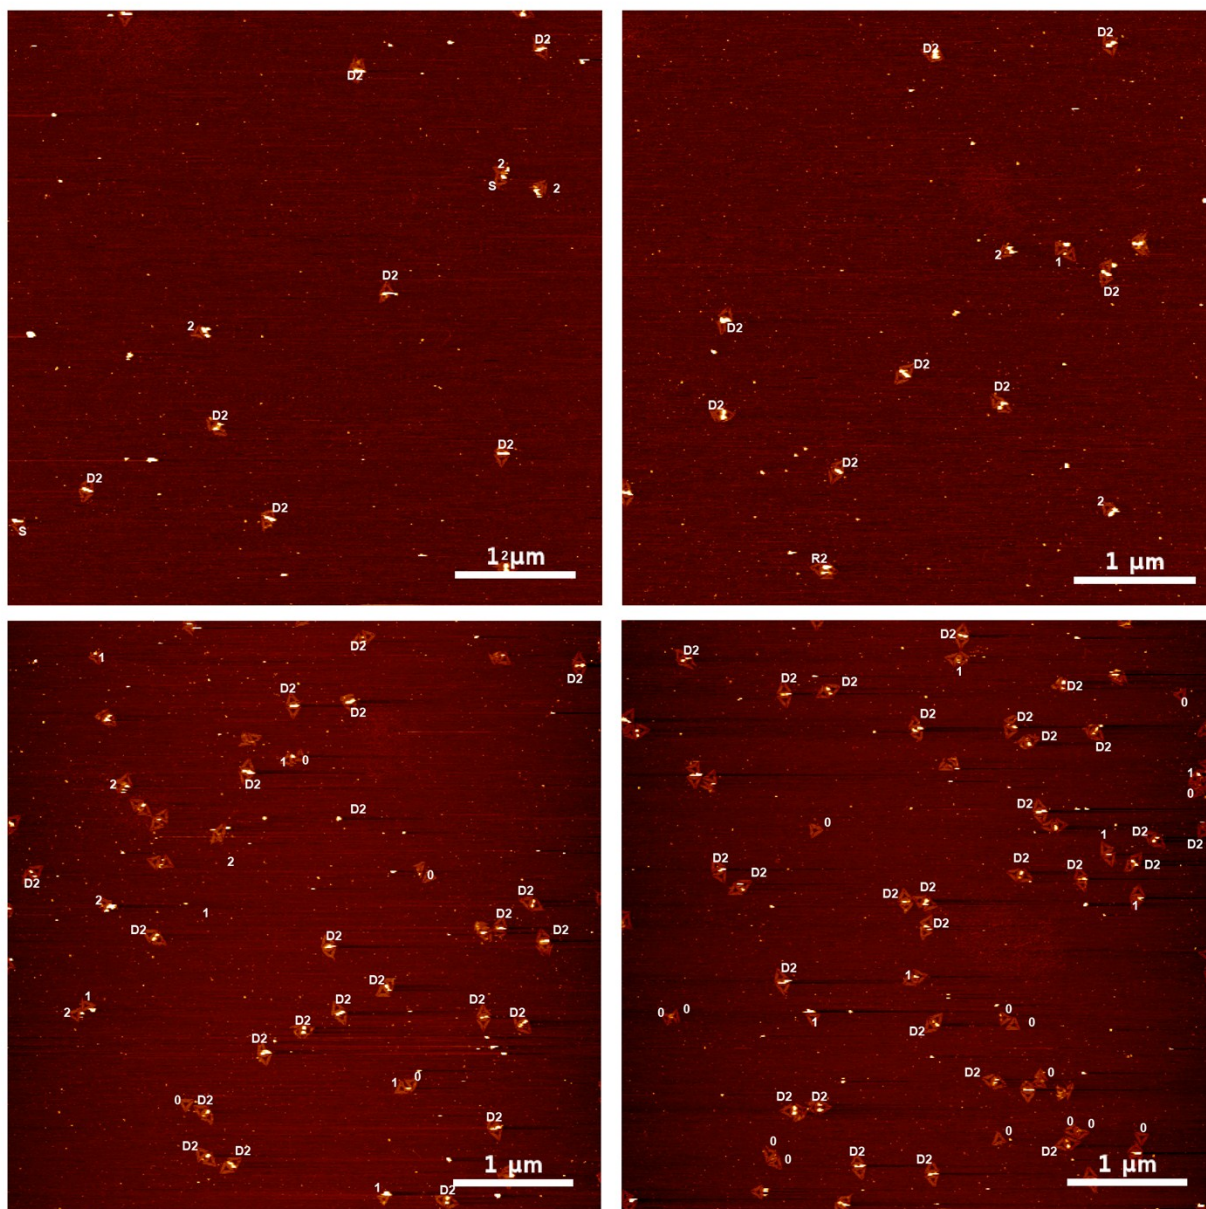

**Figure S11:** Representative AFM images of 20 X 50 nm AuNR ETE dimeric DNA triangle construct, including particle count analysis, the summary of which is shown in main text Figure 3.

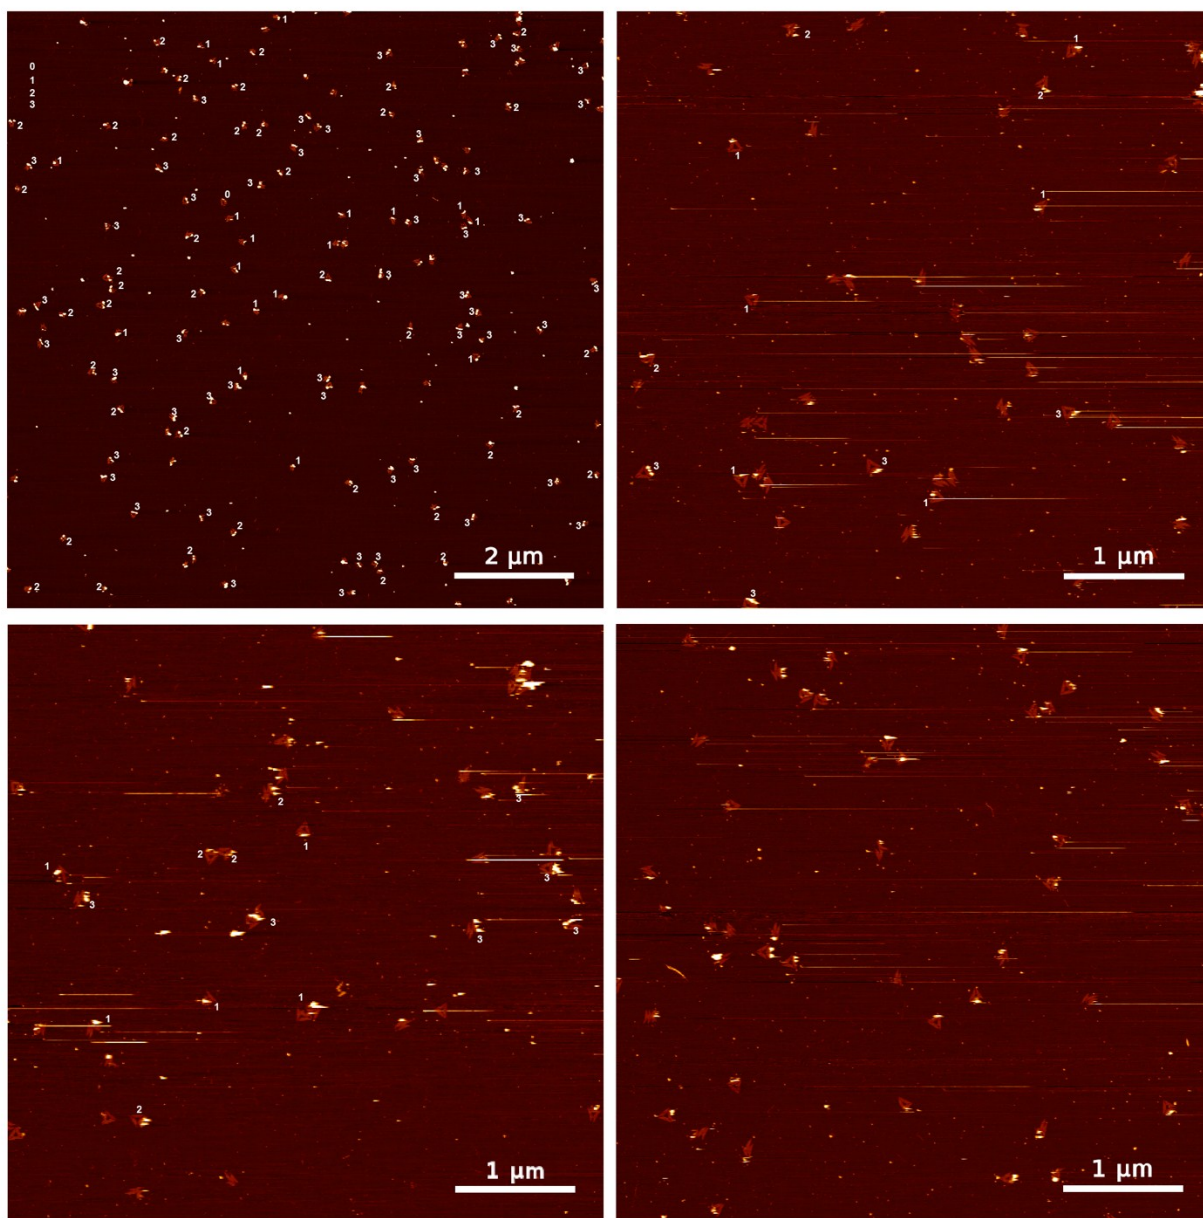

**Figure S12:** Representative AFM images of 20 X 50 nm AuNR RPR single DNA triangle construct, including particle count analysis, the summary of which is shown in main text Figure 4.

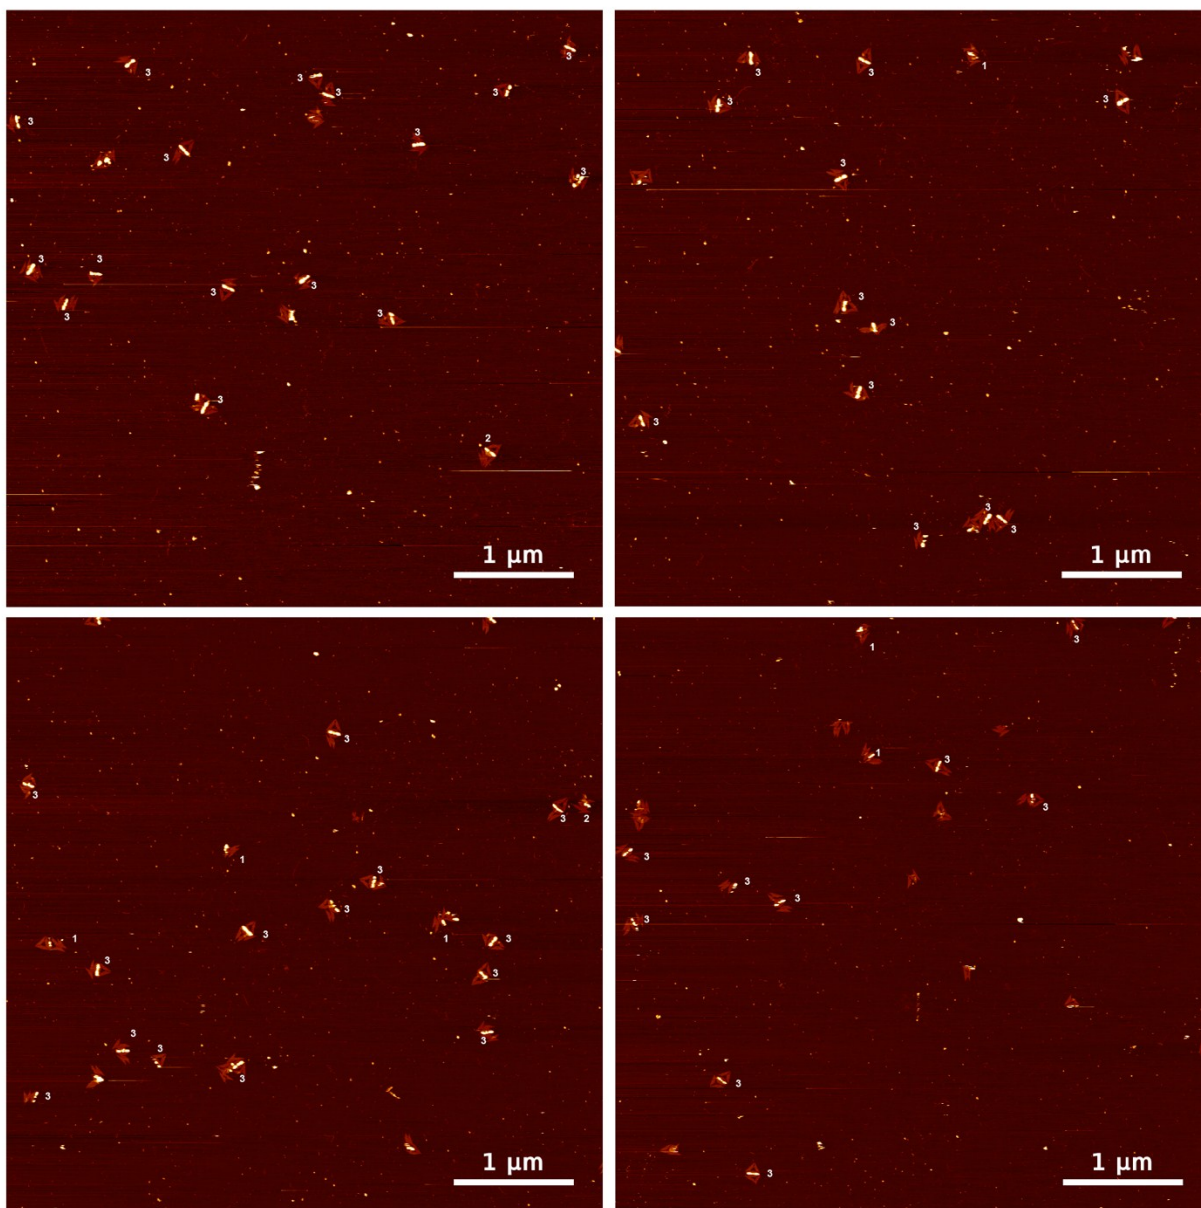

**Figure S13:** Representative AFM images of 20 X 50 nm AuNR RPR dimeric DNA triangle construct, including particle count analysis, the summary of which is shown in main text Figure 4.

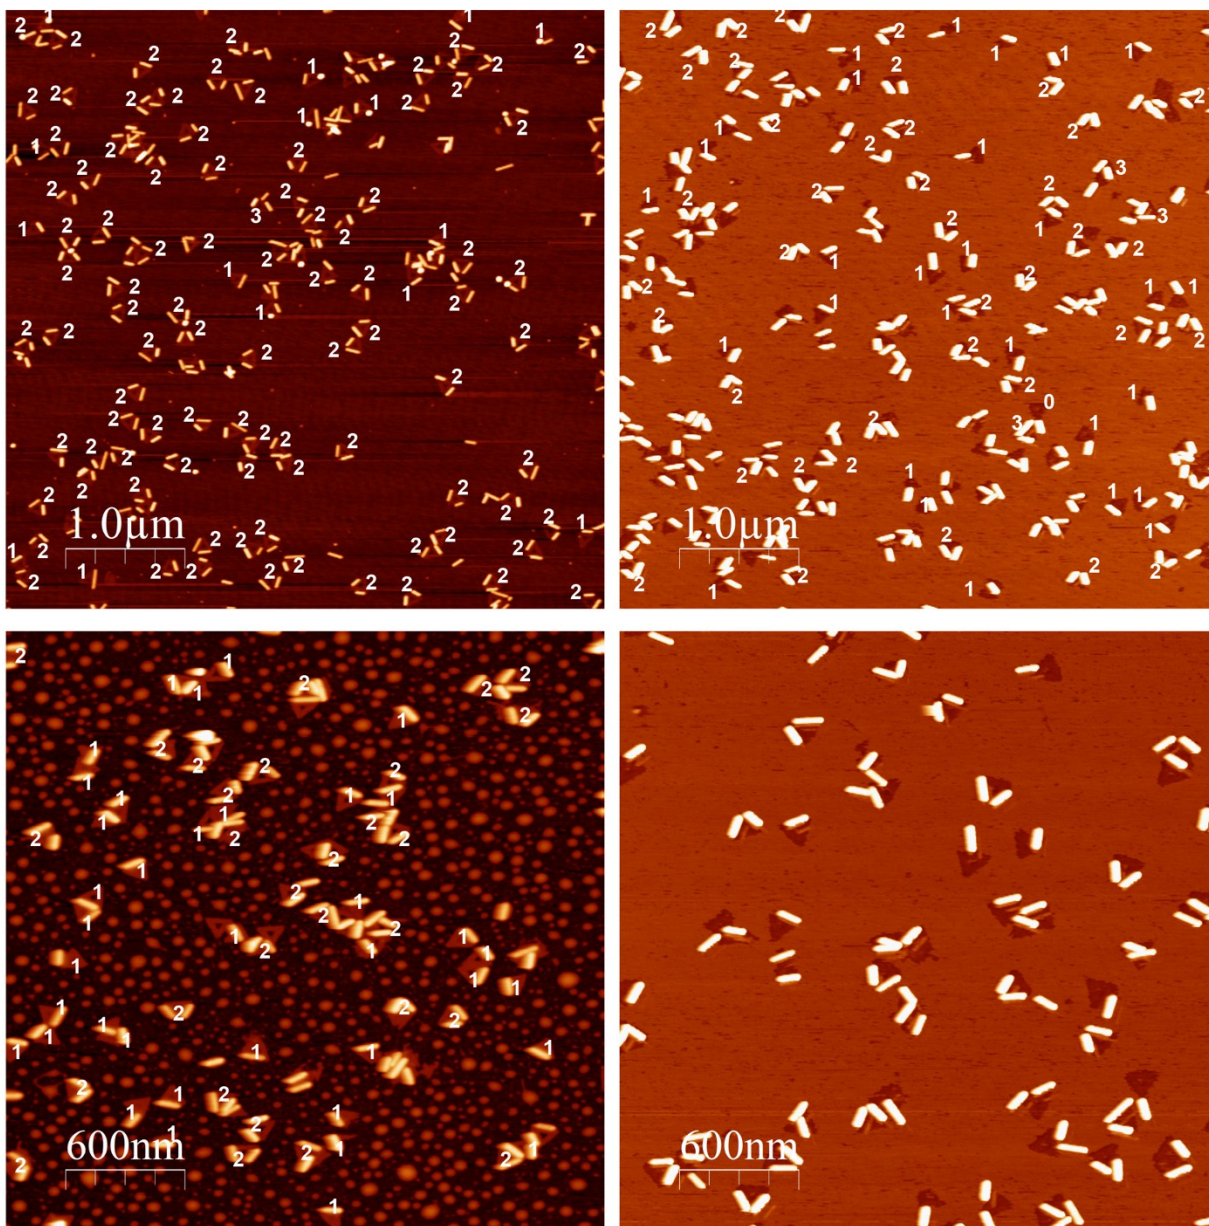

**Figure S14:** Representative AFM images of 90 nm AuNRs on the DNA triangle in inverted-V configuration, including particle count analysis, the summary of which is shown in main text Figure 5.

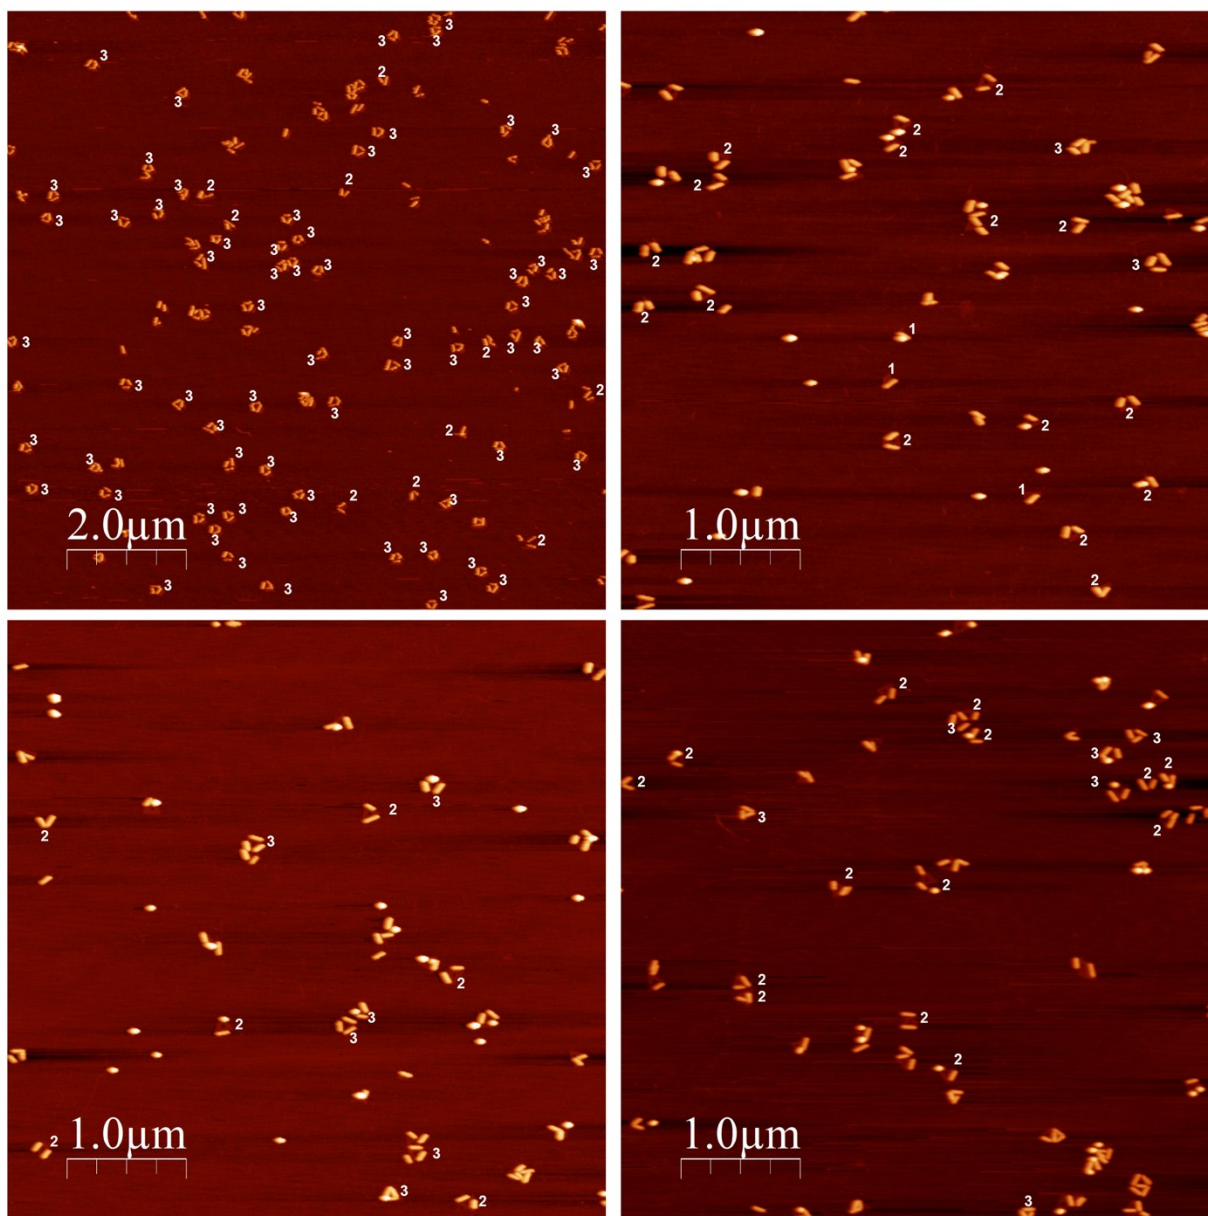

**Figure S15:** Representative AFM images of 90 nm AuNRs on the DNA triangle in three-rod-triangle configuration, including particle count analysis, the summary of which is included in main text Figure 5.

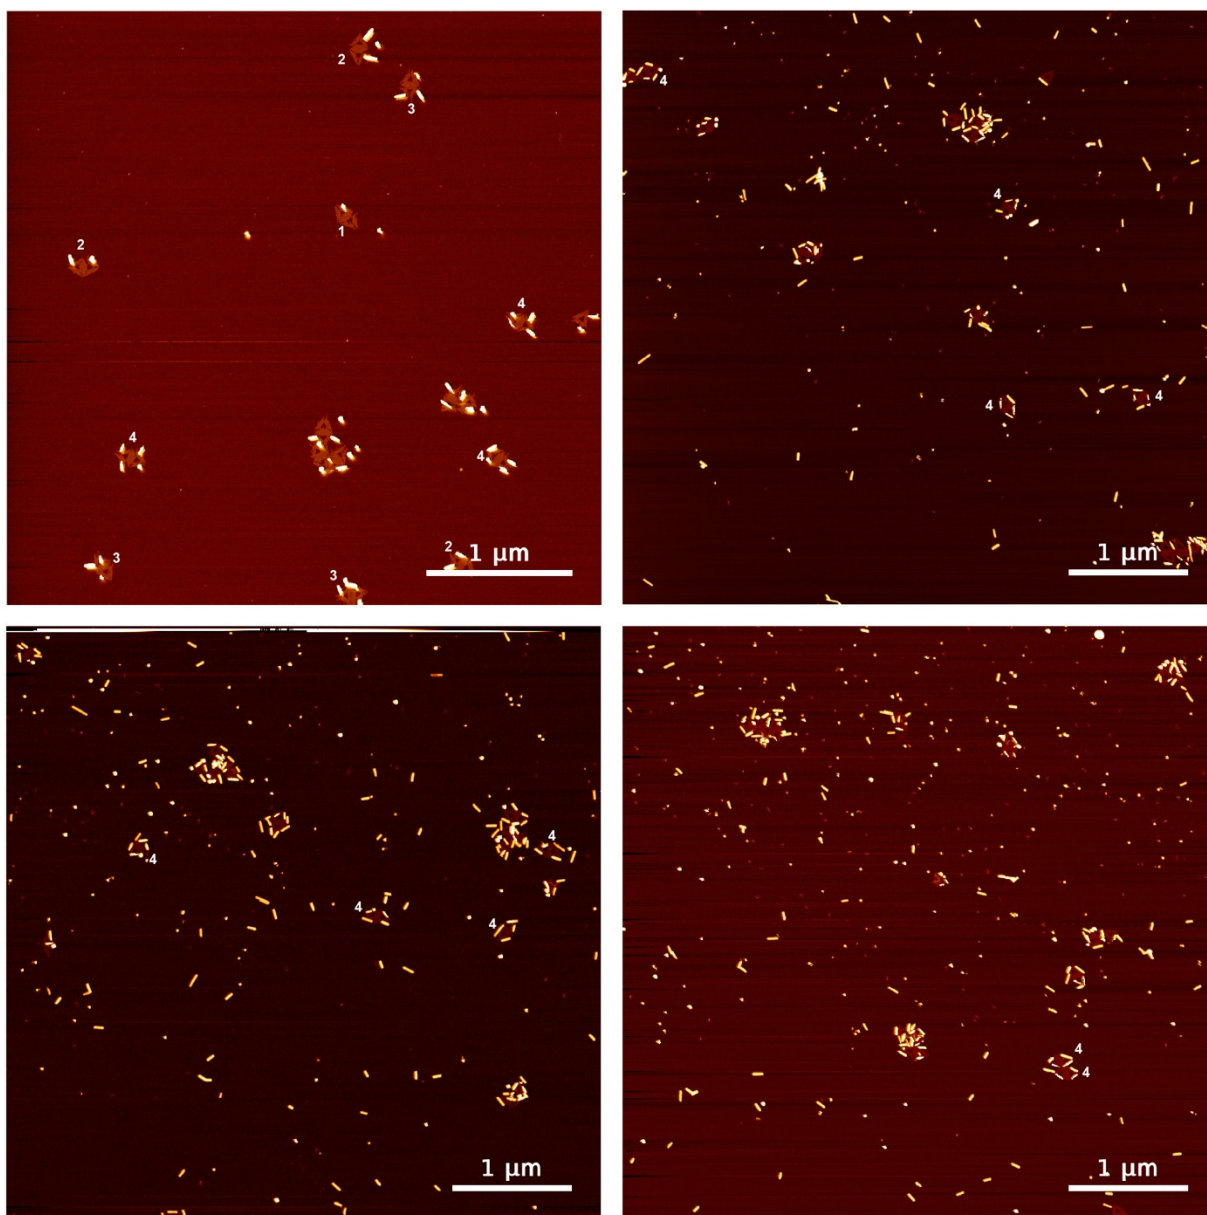

**Figure S16:** Representative AFM images of 90 nm AuNRs on the DNA rhombus, including particle count analysis, the summary of which is shown in main text Figure 6.

**Supporting Information S6: Additional TEM images of each configuration**

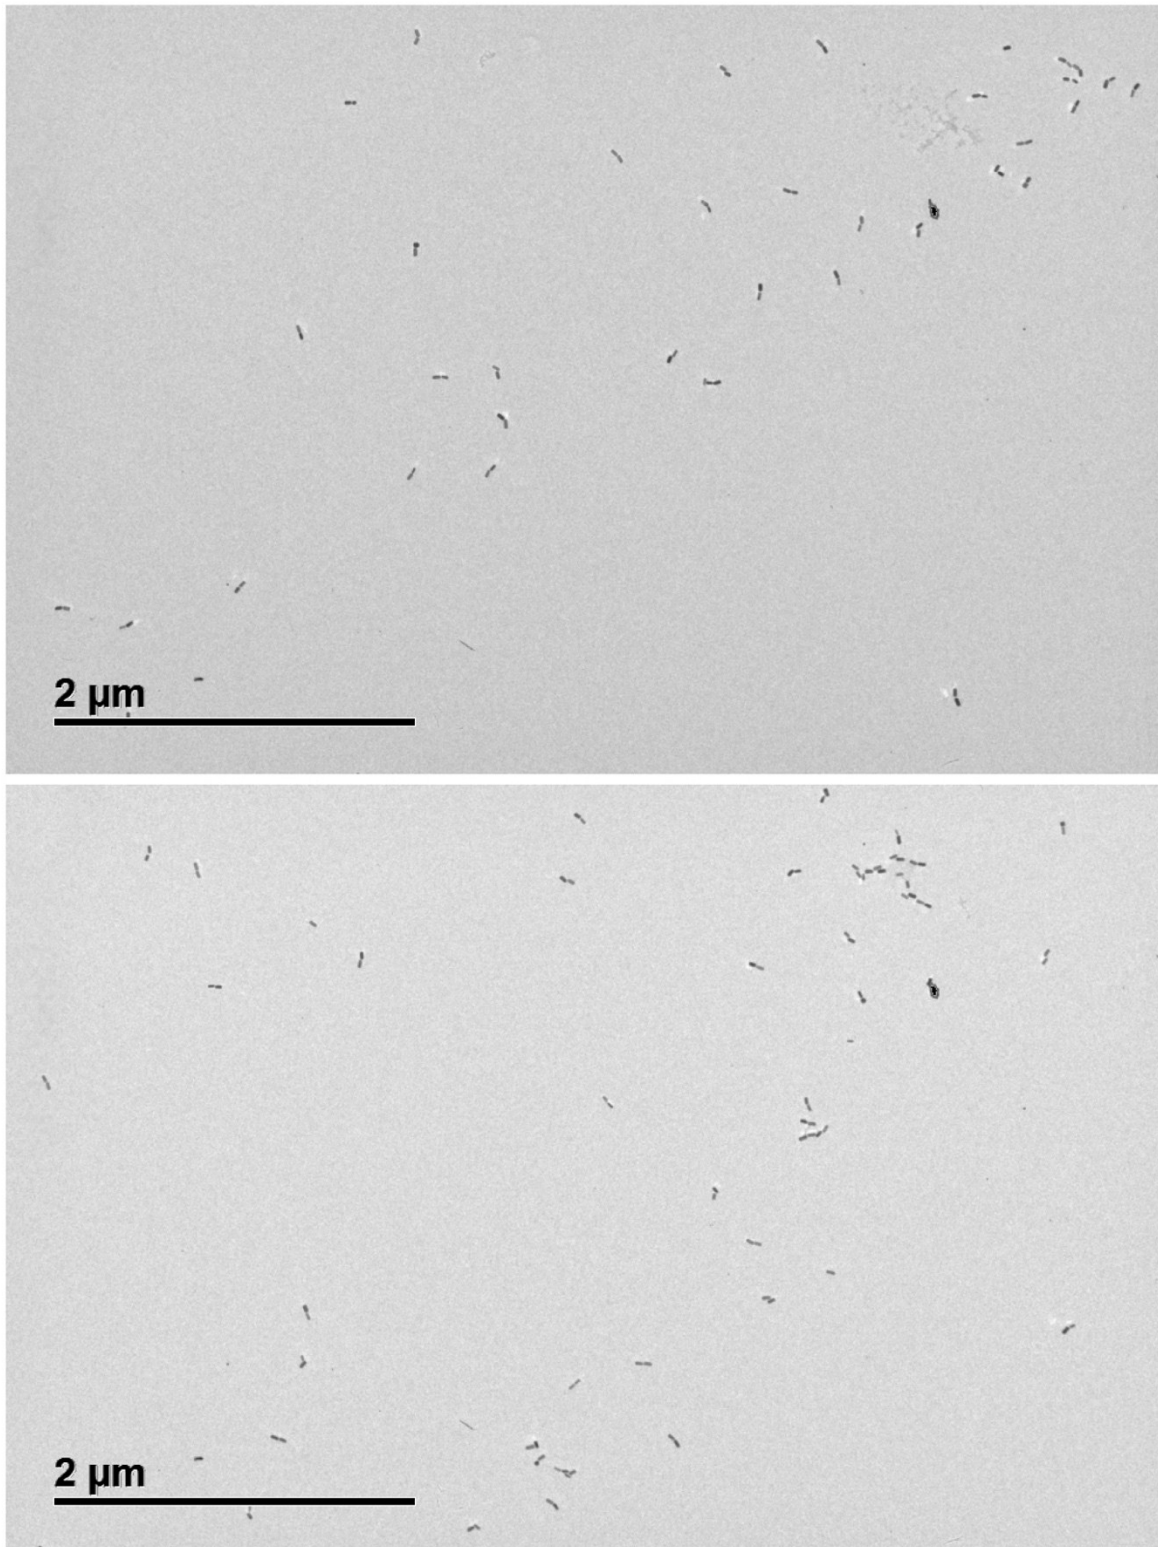

**Figure S17:** Representative TEM images of the ETE single triangle configuration.



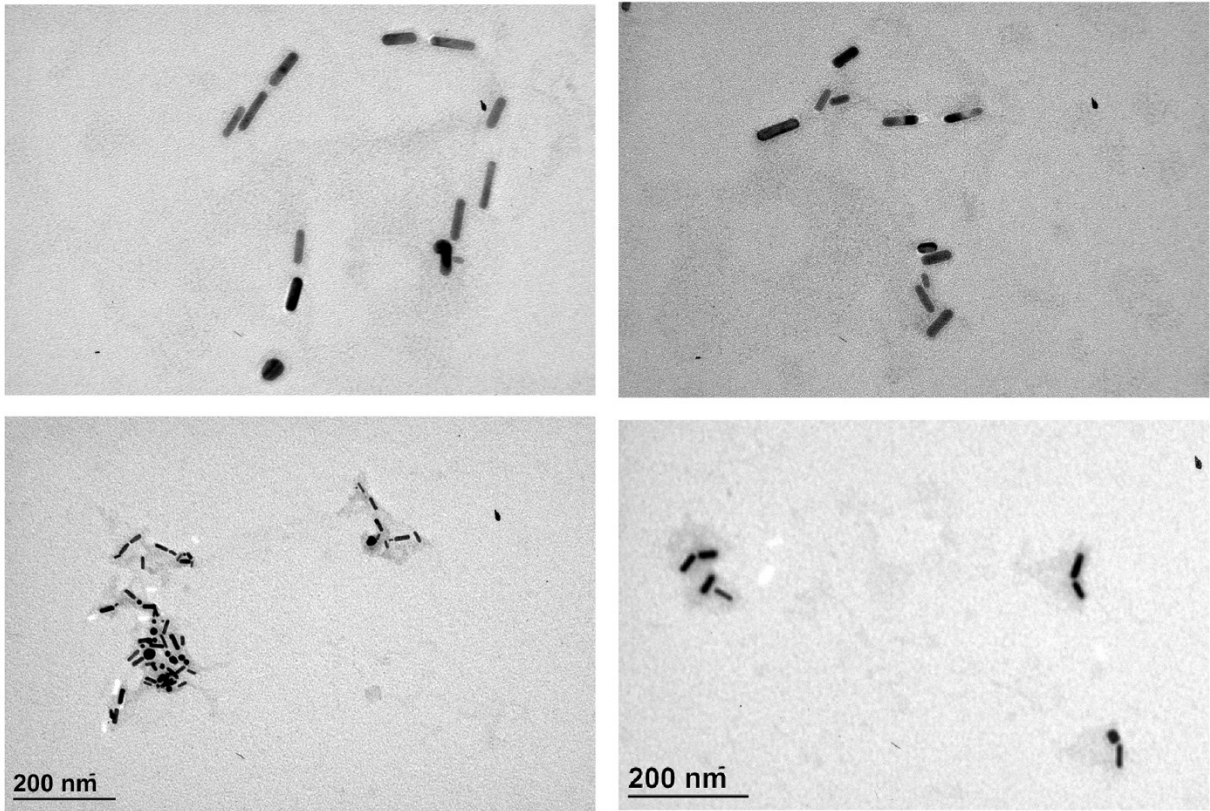

**Figure S18:** Representative TEM images of the ETE dimeric triangle configuration.

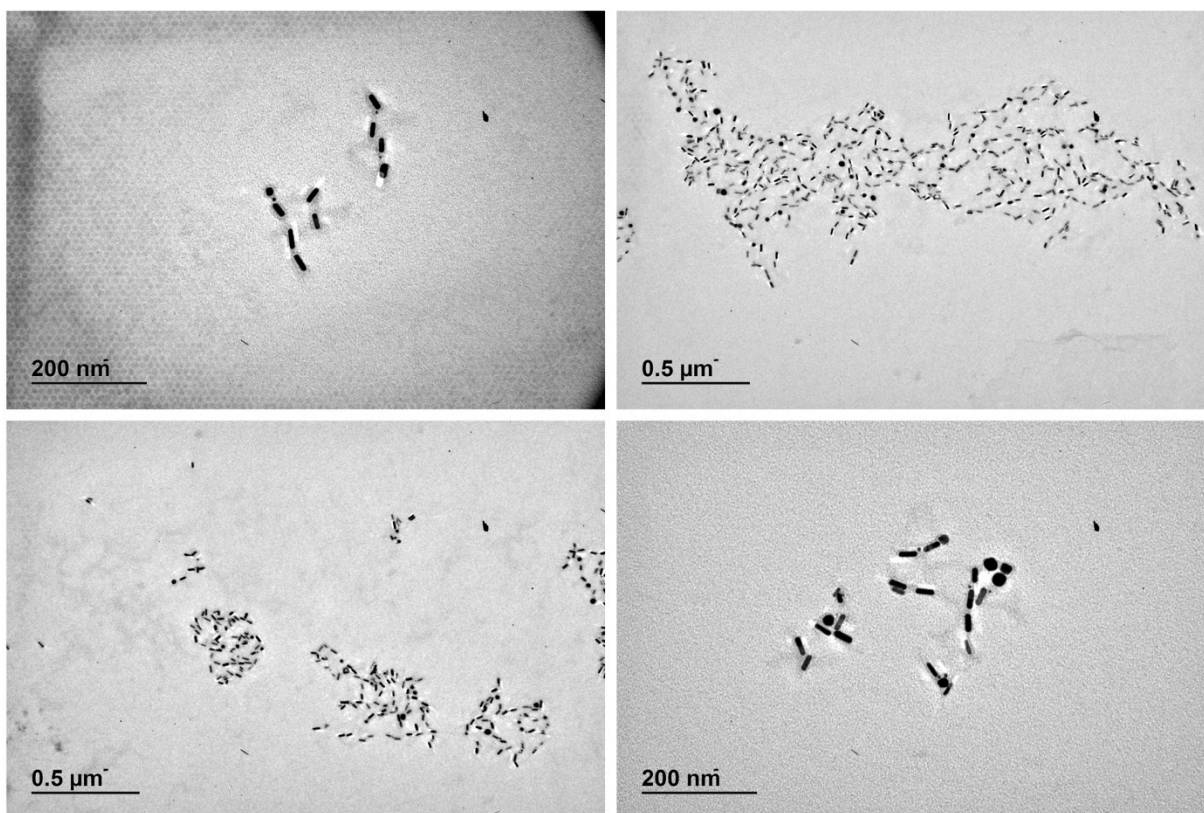

**Figure S19:** Representative TEM images of the RPR single triangle configuration.

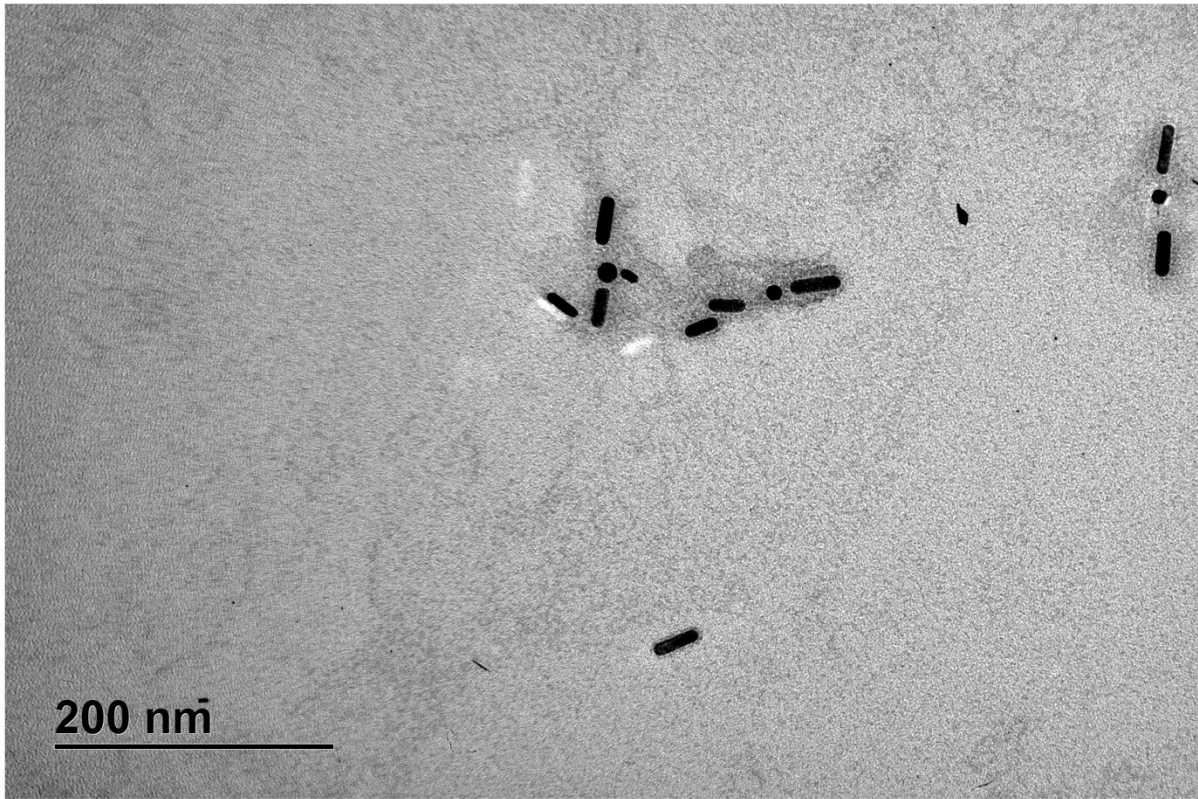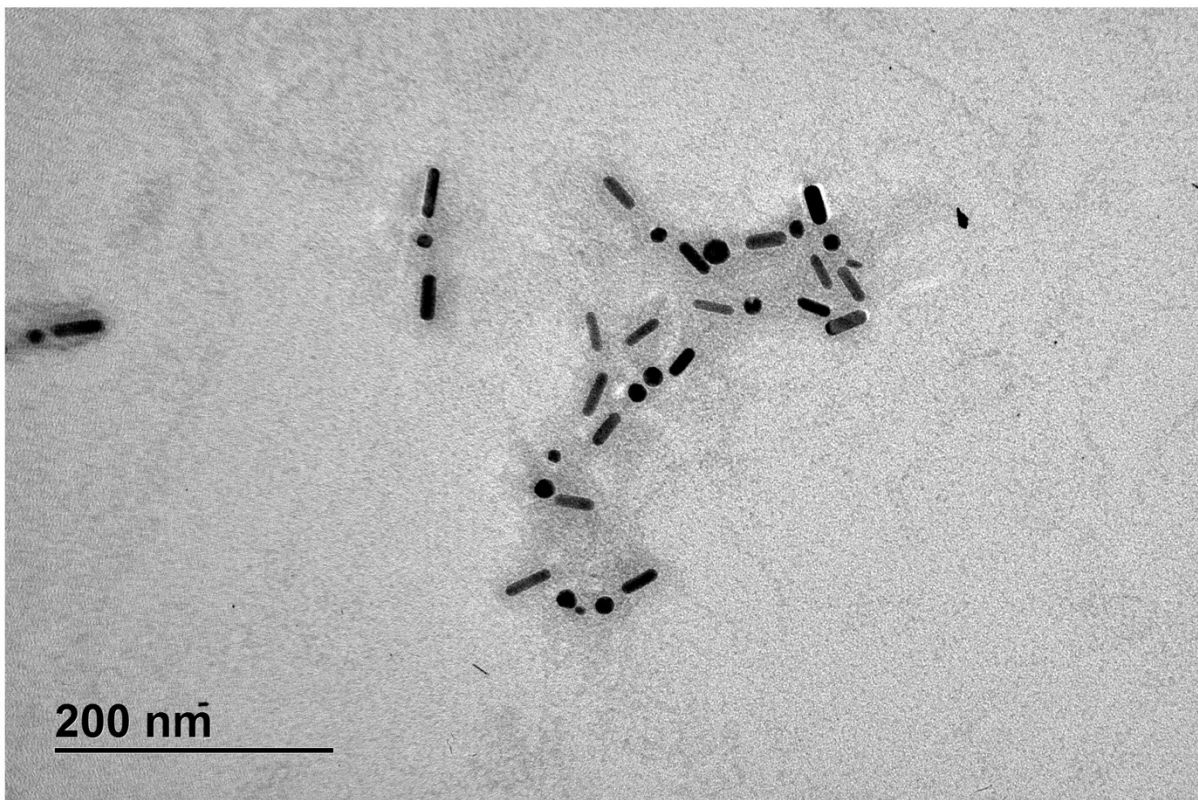

**Figure S20:** Representative TEM images of the RPR dimeric triangle configuration.

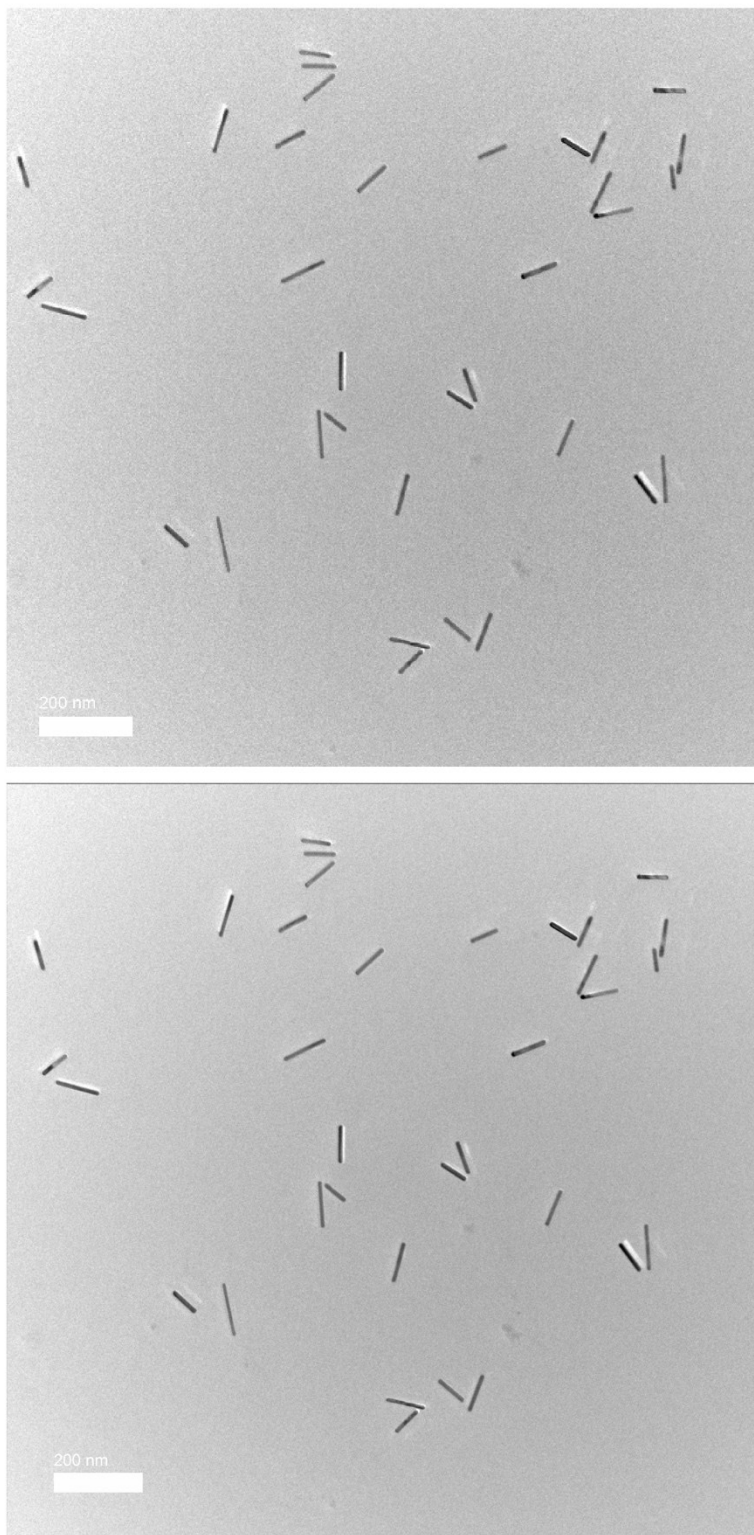

**Figure S21:** Representative TEM images of the inverted-V configuration.

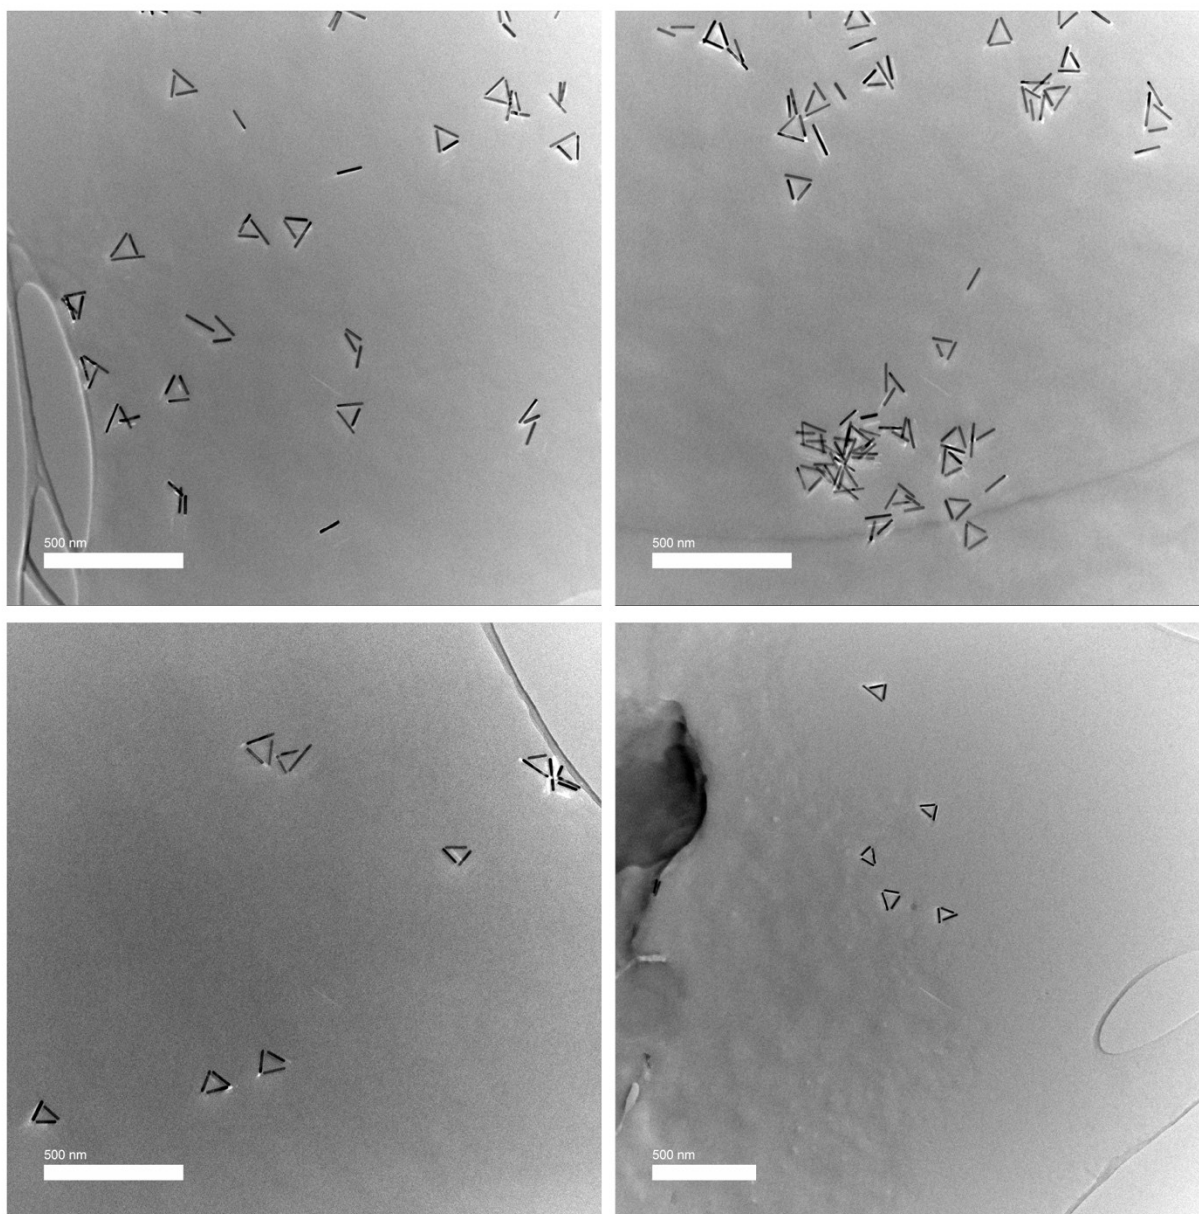

**Figure S22:** Representative TEM images of the three-rod-triangle configuration.

## Supporting Information S7: COMSOL Simulations

AuNR configurations were arranged in various geometries in a box of water surrounded by Perfectly Matched Layers to absorb reflections. The dimer structure and the ETE and RPR configurations were composed of AuNRs that were  $10 \times 40$  nm and AuNP with 10 nm diameter. The inverted-V, gold triangle, and diamond configurations were composed of AuNRs  $10 \times 90$  nm. The nanostructures were specified as gold using the Rakić model for the refractive index.<sup>10</sup> The refractive index of water was taken to be  $n = 1.344$ .

A background electric field propagating in the  $x$ -direction and polarized in the  $z$ -direction was specified in the calculation to excite the plasmon mode:  $E_{b,z} = E_0 \exp(i\omega t - ik_0 n_{\text{water}} x)$  where  $E_{b,z}$  is the  $z$ -component of the background electric field,  $E_0 = 1$  V/m,  $k_0$  is the free space wavevector, and  $n_{\text{med}}$  is the refractive index of the medium. The nanostructures were oriented in such a way to ensure excitation of the LSPR. Absorption cross sections ( $\sigma_{\text{abs}}$ ) were calculated by integrating the power

dissipation,  $Q$ , over the volume of the nanorod:  $\sigma_{\text{abs}} = \frac{\iiint Q}{P_{\text{in}}}$ , where  $P_{\text{in}}$  is the input power, which is

calculated as:  $P_{\text{in}} = \frac{E_0^2}{2Z_0 n}$ , where  $Z_0$  is the characteristic impedance of vacuum. Scattering cross sections ( $\sigma_{\text{scat}}$ ) were calculated by integrating the Poynting vector,  $S$ , over a surface surrounding

the simulation domain (the boundary between the surrounding medium and the PML):  $\sigma_{\text{scat}} = \frac{\iint S}{P_{\text{in}}}$ .

These results were then normalized such that the largest peak had a value of 1.

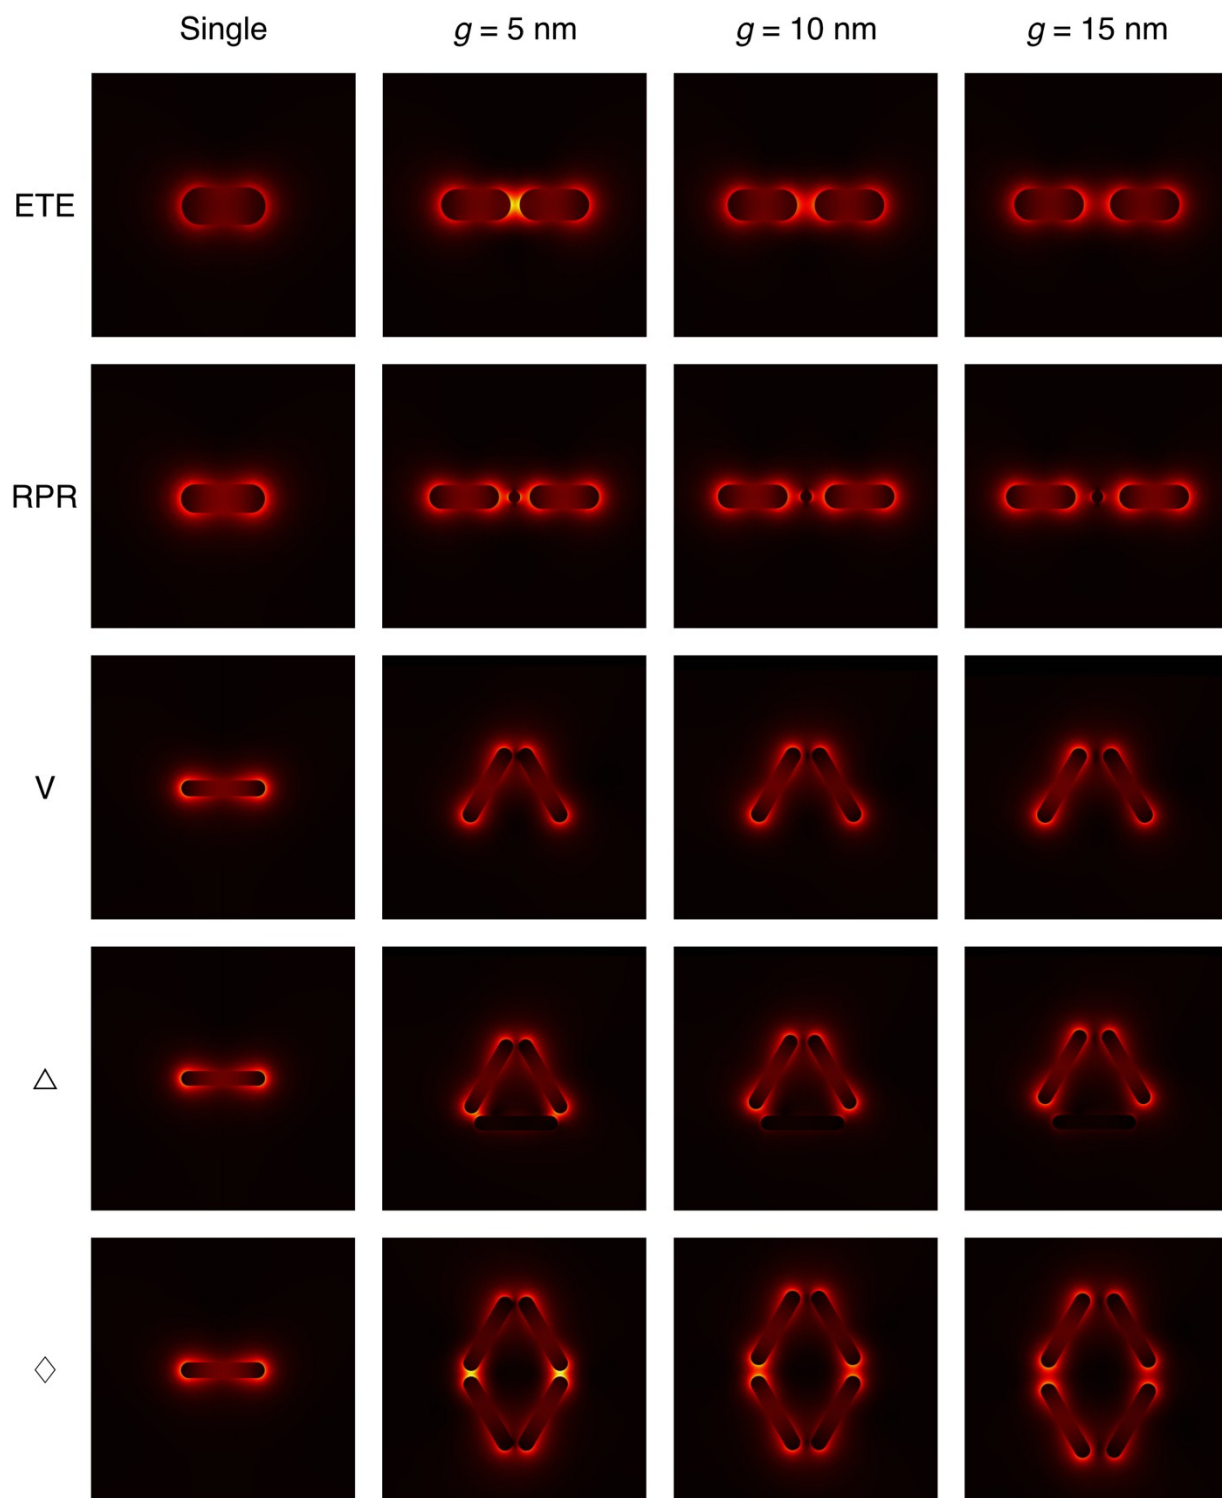

Figure S23: COMSOL rendering of simulated configurations.

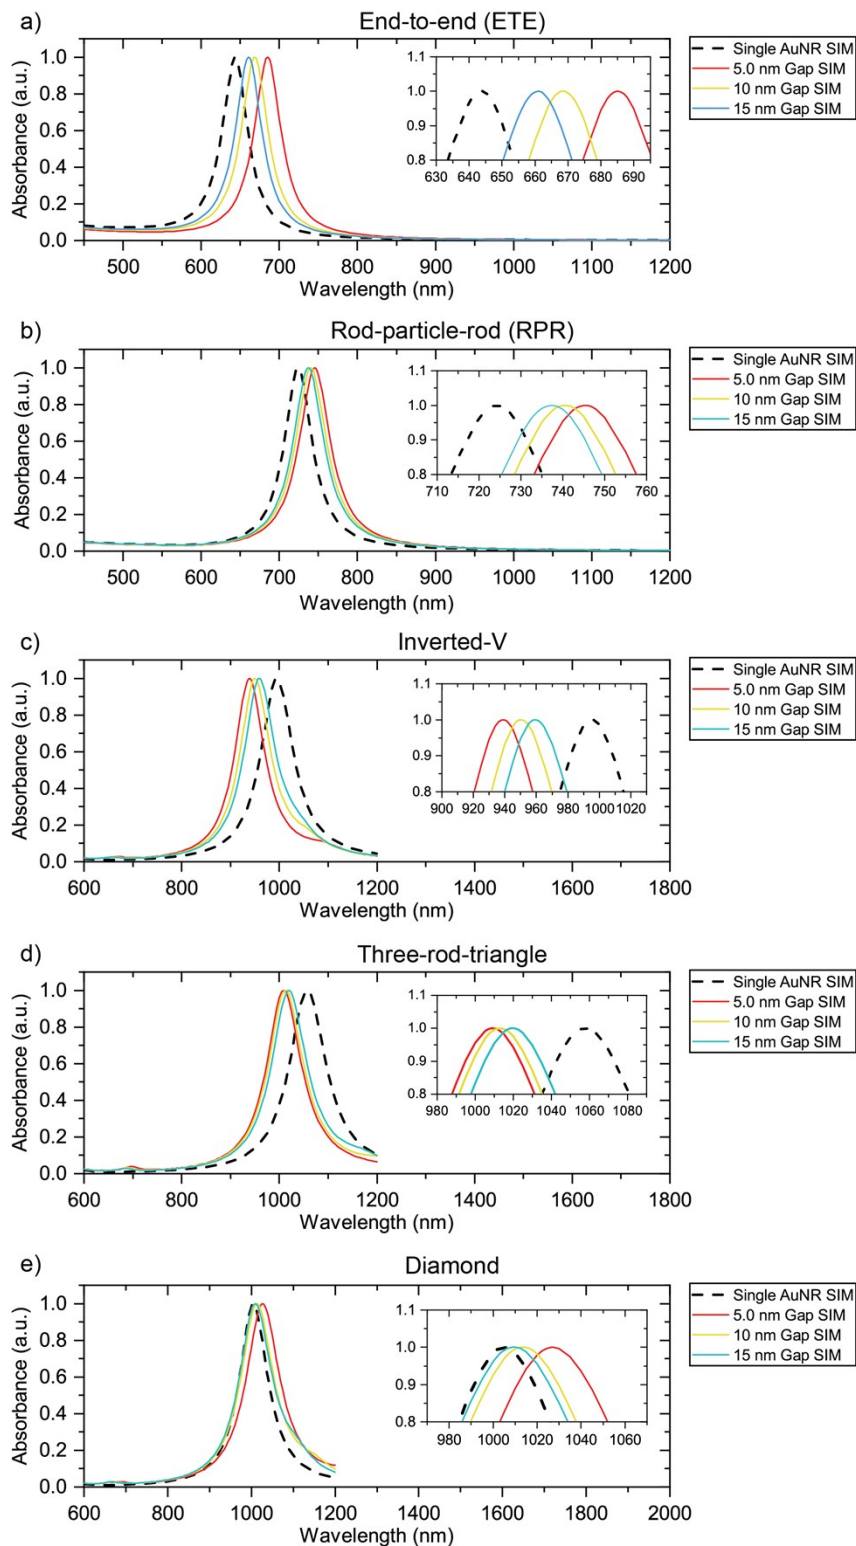

**Figure S24:** COMSOL simulations for inter-rod gaps of 5 nm, 10 nm, and 15 nm in each configuration. (a) ETE, (b) RPR, (c) inverted-V, (d) three-rod-triangle, and (e) diamond configurations



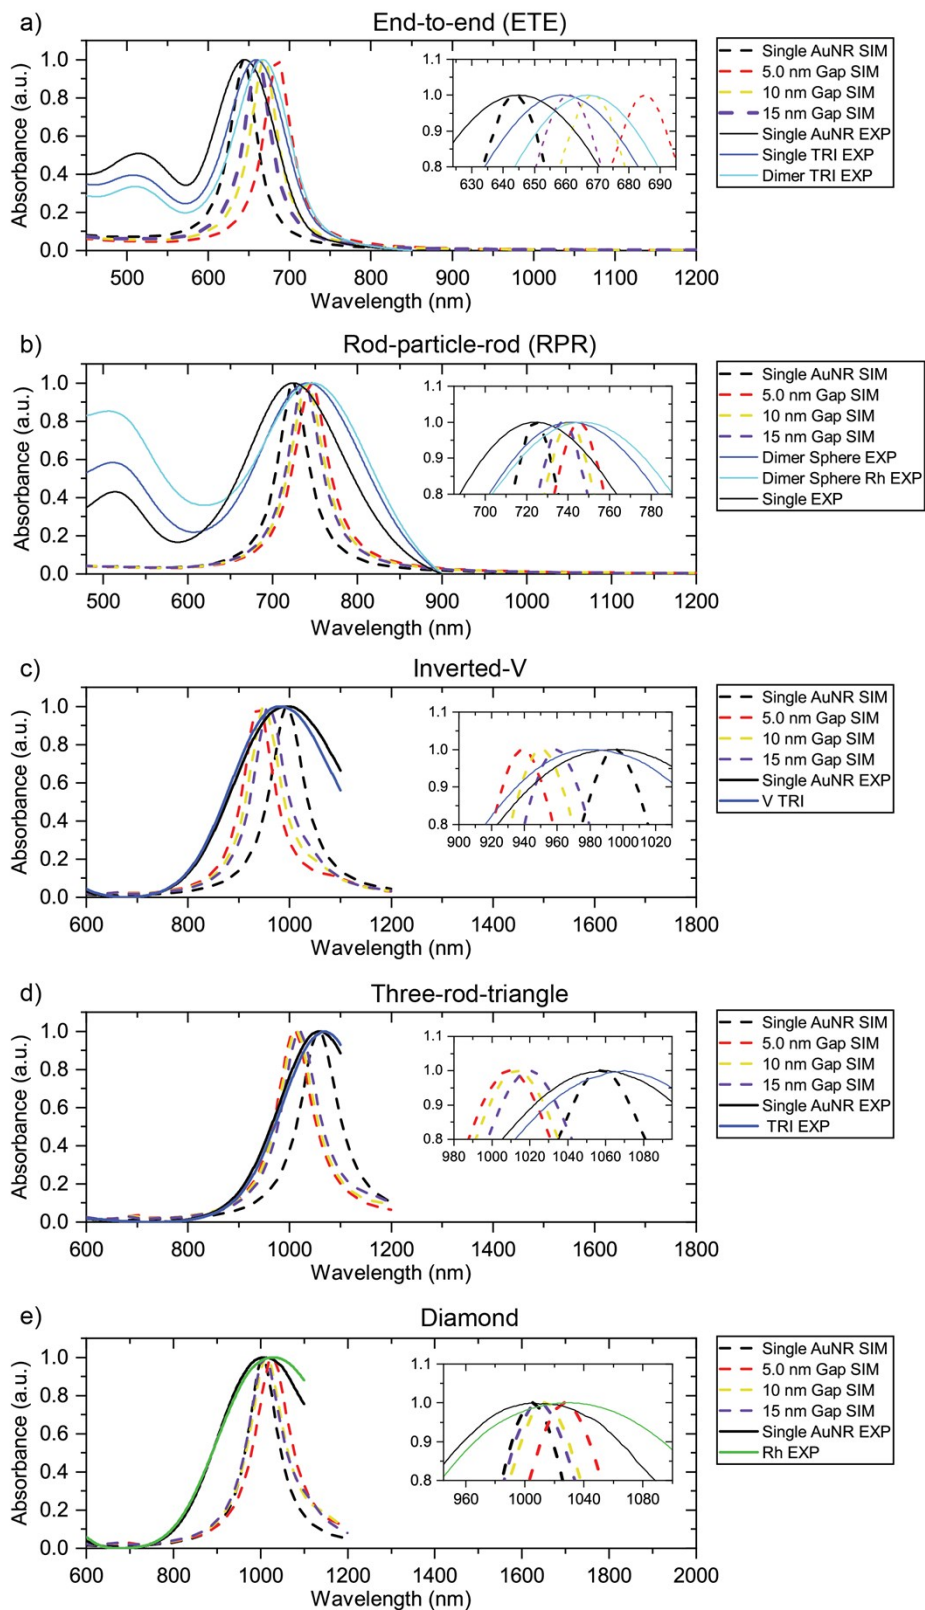

**Figure S25:** Experiment *versus* COMSOL simulations. (a) ETE, (b) RPR, (c) inverted-V, (d) three-rod-triangle, and (e) diamond configurations.

## Supporting Information S8: DNA staple, bridge, and capture sequences.

$T_m$  was calculated in accordance with the Salt Adjusted Melting Temperature Calculation:

$$T_m = 100.5 + \left( 41 * \frac{yG + zC}{wA + xT + yG + zC} \right) - \left( \frac{820}{wA + xT + yG + zC} \right) + 16.6 * \log_{10} (2 * [Mg^{2+}])$$

\*Where  $w,x,y,z$  are the number of the bases  $A,T,G,C$  in the sequence, respectively.

\*\*  $[Mg^{2+}]$  is in units of  $M$ .

Found at: Kibbe WA. 'OligoCalc: an online oligonucleotide properties calculator'. (2007) *Nucleic Acids Res.* 35(webserver issue): May 25

**Table S1:** Staple strands used for DNA triangle and rhombus nanostructures

| Name | Sequence                                  | $T_M$<br>(°C) |
|------|-------------------------------------------|---------------|
| A01  | CGGGGTTTCCTCAAGAGAAGGATTTTGAATTA          | 62.6          |
| A02  | AGCGTCATGTCTCTGAATTTACCGACTACCTT          | 63.9          |
| A03  | TTCATAATCCCCTTATTAGCGTTTTTCTTACC          | 60.0          |
| A04  | ATGGTTTATGTCACAATCAATAGATATTAAC           | 56.2          |
| A05  | TTTGATGATTAAGAGGCTGAGACTTGCTCAGTACCAGGCG  | 70.5          |
| A06  | CCGGAACCCAGAATGGAAAGCGCAACATGGCT          | 69.0          |
| A07  | AAAGACAACATTTTCGGTCATAGCCAAAATCA          | 60.0          |
| A08  | GACGGGAGAATTAACCTCGGAATAAGTTTATTTCCAGCGCC | 69.5          |
| A09  | GATAAGTGCCGTCGAGCTGAAACATGAAAGTATACAGGAG  | 69.5          |
| A10  | TGTACTGGAAATCCTCATTAAAGCAGAGCCAC          | 63.9          |
| A11  | CACCGGAAAGCGCGTTTTTCATCGGAAGGGCGA         | 70.3          |
| A12  | CATTCAACAAACGCAAAGACACCAGAACCCTGAACAAA    | 68.5          |
| A13  | TTTAACGGTTCGGAACCTATTATTAGGGTTGATATAAGTA  | 64.4          |
| A14  | CTCAGAGCATATTACAAAACAAATTAATAAGT          | 57.4          |
| A15  | GGAGGGAATTTAGCGTCAGACTGTCCGCCTCC          | 70.3          |
| A16  | GTCAGAGGGTAATTGATGGCAACATATAAAAAGCGATTGAG | 67.4          |
| A17  | TAGCCCGGAATAGGTGAATGCCCCCTGCCTATGGTCAGTG  | 74.6          |
| A18  | CCTTGAGTCAGACGATTGGCCTTGCGCCACCC          | 71.5          |
| A19  | TCAGAACCCAGAATCAAGTTTGCCGGTAAATA          | 62.6          |
| A20  | TTGACGGAAATACATACATAAAGGGCGCTAATATCAGAGA  | 66.4          |
| A21  | CAGAGCCAGGAGGTTGAGGCAGGTAACAGTGCCCG       | 73.9          |
| A22  | ATTAAGGCCGTAATCAGTAGCGAGCCACCCT           | 66.4          |
| A23  | GATAACCCACAAGAATGTTAGCAAACGTAGAAAATTATTC  | 64.4          |
| A24  | GCCGCCAGCATTGACACCACCCTC                  | 64.7          |
| A25  | AGAGCCGCACCATCGATAGCAGCATGAATTAT          | 65.1          |
| A26  | CACCGTCACCTTATTACGCAGTATTGAGTTAAGCCCAATA  | 68.5          |
| A27  | AGCCATTTAAACGTCACCAATGAACACCAGAACCA       | 65.7          |

|     |                                              |      |
|-----|----------------------------------------------|------|
| A28 | ATAAGAGCAAGAAACATGGCATGATTAAGACTCCGACTTG     | 67.4 |
| A29 | CCATTAGCAAGGCCGGGGAATTA                      | 59.6 |
| A30 | GAGCCAGCGAATACCCAAAAGAACATGAAATAGCAATAGC     | 68.5 |
| A31 | TATCTTACCGAAGCCCAAACGCAATAATAACGAAAATCACCAG  | 68.7 |
| A32 | CAGAAGGAAACCGAGGTTTTTAAGAAAAGTAAGCAGATAGCCG  | 69.6 |
| A33 | CCTTTTTTTCATTTAACAATTTTCATAGGATTAG           | 56.2 |
| A34 | TTTAACCTATCATAGGTCTGAGAGTTCCAGTA             | 61.3 |
| A35 | AGTATAAAATATGCGTTATACAAAGCCATCTT             | 57.4 |
| A36 | CAAGTACCTCATTCCAAGAACGGGAAATTCAT             | 62.6 |
| A37 | AGAGAATAACATAAAAAACAGGGAAGCGCATT             | 60.0 |
| A38 | AAAACAAAATTAATTTAAATGGAAACAGTACATTAGTGAAT    | 59.2 |
| A39 | TTATCAAACCGGCTTAGGTTGGGTAAGCCTGT             | 65.1 |
| A40 | TTAGTATCGCCAACGCTCAACAGTCGGCTGTC             | 67.7 |
| A41 | TTTCCTTAGCACTCATCGAGAACAATAGCAGCCTTTACAG     | 68.5 |
| A42 | AGAGTCAAAAATCAATATATGTGATGAAACAAACATCAAG     | 62.3 |
| A43 | ACTAGAAATATATAACTATATGTACGCTGAGA             | 57.4 |
| A44 | TCAATAATAGGGCTTAATTGAGAATCATAATT             | 56.2 |
| A45 | AACGTCAAAAATGAAAAGCAAGCCGTTTTTATGAAACCAA     | 64.4 |
| A46 | GAGCAAAAGAAGATGAGTGAATAACCTTGCTTATAGCTTA     | 65.4 |
| A47 | GATTAAGAAATGCTGATGCAAATCAGAATAAA             | 57.4 |
| A48 | CACCGGAATCGCCATATTTAACAAAATTTACG             | 61.3 |
| A49 | AGCATGTATTTTCATCGTAGGAATCAAACGATTTTTTGT      | 63.3 |
| A50 | ACATAGCGCTGTAAATCGTCGCTATTCATTTCAATTACCT     | 66.4 |
| A51 | GTTAAATACAATCGCAAGACAAAGCCTTGAAA             | 60.0 |
| A52 | CCCATCCTCGCCAACATGTAATTTAATAAGGC             | 63.9 |
| A53 | TCCCAATCCAAATAAGATTACCGCGCCCAATAAATAATAT     | 65.4 |
| A54 | TCCCTTAGAATAACGCGAGAAAACTTTTACCGACC          | 65.7 |
| A55 | GTGTGATAAGGCAGAGGCATTTTTCAGTCCTGA            | 65.1 |
| A56 | ACAAGAAAGCAAGCAAATCAGATAACAGCCATATTATTTA     | 63.3 |
| A57 | GTTTGAAATTCAAATATATTTTAG                     | 44.2 |
| A58 | AATAGATAGAGCCAGTAATAAGAGATTTAATG             | 57.4 |
| A59 | GCCAGTTACAAAATAATAGAAGGCTTATCCGGTTATCAAC     | 66.4 |
| A60 | TTCTGACCTAAAATATAAAGTACCGACTGCAGAAC          | 63.3 |
| A61 | GCGCCTGTTATTCTAAGAACGCGATTCCAGAGCCTAATTT     | 69.5 |
| A62 | TCAGCTAAAAAAGGTAAAGTAATT                     | 47.6 |
| A63 | ACGCTAACGAGCGTCTGGCGTTTTAGCGAACCCAACATGT     | 72.6 |
| A64 | ACGACAATAAATCCCGACTTGCGGGAGATCCTGAATCTTACCA  | 71.5 |
| A65 | TGCTATTTTGCACCCAGCTACAATTTTGTGTTTGAAGCCTTAAA | 66.8 |
| B01 | TCATATGTGTAATCGTAAAACACTAGTCATTTTC           | 57.4 |
| B02 | GTGAGAAAATGTGTAGGTAAAGATACAACCTT             | 58.7 |

|     |                                             |      |
|-----|---------------------------------------------|------|
| B03 | GGCATCAAATTTGGGGCGCGAGCTAGTTAAAG            | 66.4 |
| B04 | TTCGAGCTAAGACTTCAAATATCGGGAACGAG            | 63.9 |
| B05 | ACAGTCAAAGAGAATCGATGAACGACCCCGTTGATAATC     | 69.5 |
| B06 | ATAGTAGTATGCAATGCCTGAGTAGGCCGGAG            | 66.4 |
| B07 | AACCAGACGTTTAGCTATATTTTCTTCTACTA            | 58.7 |
| B08 | GAATACCACATTCAACTTAAGAGGAAGCCCGATCAAAGCG    | 69.5 |
| B09 | AGAAAAGCCCCAAAAAGAGTCTGGAGCAAACAATCACCAT    | 68.5 |
| B10 | CAATATGACCCTCATATATTTTAAAGCATTAA            | 56.2 |
| B11 | CATCCAATAAATGGTCAATAACCTCGGAAGCA            | 62.6 |
| B12 | AACTCCAAGATTGCATCAAAAAGATAATGCAGATACATAA    | 63.3 |
| B13 | CGTTCTAGTCAGGTCATTGCCTGACAGGAAGATTGTATAA    | 68.5 |
| B14 | CAGGCAAGATAAAAAATTTTGTAGAATATTCAAC          | 56.2 |
| B15 | GATTAGAGATTAGATACATTTTCGCAAATCATA           | 57.4 |
| B16 | CGCCAAAAGGAATTACAGTCAGAAGCAAAGCGCAGGTCAG    | 71.5 |
| B17 | GCAAATATTTAAATTGAGATCTACAAAGGCTACTGATAAA    | 62.3 |
| B18 | TTAATGCCTTATTTCAACGCAAGGGCAAAGAA            | 61.3 |
| B19 | TTAGCAAATAGATTTAGTTTGACCAGTACCTT            | 58.7 |
| B20 | TAATTGCTTTACCCTGACTATTATGAGGCATAGTAAGAGC    | 66.4 |
| B21 | ATAAAGCCTTTGCGGGAGAAGCCTGGAGAGGGTAG         | 70.4 |
| B22 | TAAGAGGTCAATTCTGCGAACGAGATTAAGCA            | 62.6 |
| B23 | AACACTATCATAACCCATCAAAAATCAGGTCTCCTTTTGA    | 65.4 |
| B24 | ATGACCCTGTAATACTTCAGAGCA                    | 54.5 |
| B25 | TAAAGCTATATAACAGTTGATTCCCATTTTTG            | 57.4 |
| B26 | CGGATGGCACGAGAATGACCATAATCGTTTACCAGACGAC    | 71.5 |
| B27 | TAATTGCTTGGAAGTTTCATTCCAAATCGGTTGTA         | 62.2 |
| B28 | GATAAAAACAAAATATTTAAACAGTTCAGAAATTAGAGCT    | 61.3 |
| B29 | ACTAAAGTACGGTGTGCAATATAA                    | 51.0 |
| B30 | TGCTGTAGATCCCCCTCAAATGCTGCGAGAGGCTTTTGCA    | 72.6 |
| B31 | AAAGAAGTTTTGCCAGCATAAATATTCATTGACTCAACATGTT | 64.9 |
| B32 | AATACTGCGGAATCGTAGGGGGTAATAGTAAAATGTTTAGACT | 67.7 |
| B33 | AGGGATAGCTCAGAGCCACCACCCCATGTCAA            | 69.0 |
| B34 | CAACAGTTTATGGGATTTTGCTAATCAAAGG             | 60.0 |
| B35 | GCCGCTTTGCTGAGGCTTGCAGGGGAAAAGGT            | 70.3 |
| B36 | GCGCAGACTCCATGTTACTTAGCCCGTTTTAA            | 65.1 |
| B37 | ACAGGTAGAAAGATTCATCAGTTGAGATTTAG            | 60.0 |
| B38 | CCTCAGAACC GCCACCCAAGCCCAATAGGAACGTAAATGA   | 72.6 |
| B39 | ATTTTCTGTCAGCGGAGTGAGAATACCGATAT            | 62.6 |
| B40 | ATTCGGTCTGCGGGATCGTCACCCGAAATCCG            | 70.3 |
| B41 | CGACCTGCGGTCAATCATAAGGGAACGGAACAACATTATT    | 69.5 |
| B42 | AGACGTTACCATGTACCGTAACACCCTCAGAACCGCCAC     | 73.6 |

|     |                                              |      |
|-----|----------------------------------------------|------|
| B43 | CACGCATAAGAAAGGAACAACCTAAGTCTTTCC            | 62.6 |
| B44 | ATTGTGTCTCAGCAGCGAAAGACACCATCGCC             | 67.7 |
| B45 | TTAATAAAAACGAACTAACCGAAGTACCAACTCCTGATAA     | 65.4 |
| B46 | AGGTTTAGTACCGCCATGAGTTTCGTCACCAGGATCTAAA     | 69.5 |
| B47 | GTTTTGTCAGGAATTGCGAATAATCCGACAAT             | 61.3 |
| B48 | GACAACAAGCATCGGAACGAGGGTGAGATTTG             | 66.4 |
| B49 | TATCATCGTTGAAAGAGGACAGATGGAAGAAAAATCTACG     | 66.4 |
| B50 | AGCGTAACTACAACTACAACGCCTATCACCGTACTCAGG      | 70.5 |
| B51 | TAGTTGCGAATTTTTTTCACGTTGATCATAGTT            | 58.7 |
| B52 | GTACAACGAGCAACGGCTACAGAGGATACCGA             | 67.7 |
| B53 | ACCAGTCAGGACGTTGGAACGGTGTACAGACCGAAACAAA     | 71.5 |
| B54 | ACAGACAGCCCAAATCTCCAAAAAAAATTTCTTA           | 61.0 |
| B55 | AACAGCTTGCTTTGAGGACTAAAGCGATTATA             | 61.3 |
| B56 | CCAAGCGCAGGCGCATAGGCTGGCAGAAGTGGCTCATTAT     | 74.6 |
| B57 | CGAGGTGAGGCTCCAAAAGGAGCC                     | 63.0 |
| B58 | ACCCCAGACTTTTTTCATGAGGAACTTGCTTT             | 63.9 |
| B59 | ACCTTATGCGATTTTATGACCTTCATCAAGAGCATCTTTG     | 66.4 |
| B60 | CGGTTTATCAGGTTTCCATTAAACGGGAATACACT          | 64.5 |
| B61 | AAAACACTTAATCTTGACAAGAAGTAAATCATTGTGAATT     | 61.3 |
| B62 | GGCAAAAGTAAAATACGTAATGCC                     | 52.7 |
| B63 | TGGTTTAAATTTCAACTCGGATATTCATTACCCACGAAAGA    | 65.4 |
| B64 | ACCAACCTAAAAATCAACGTAACAAATAAATTGGGCTTGAGA   | 65.8 |
| B65 | CCTGACGAGAAACACCAGAACGAGTAGGCTGCTCATTACAGTGA | 73.4 |
| C01 | TCGGGAGATATACAGTAACAGTACAAATAATT             | 58.7 |
| C02 | CCTGATTAAAGGAGCGGAATTATCTCGGCCTC             | 66.4 |
| C03 | GCAAATCACCTCAATCAATATCTGCAGGTCGA             | 63.9 |
| C04 | CGACCAGTACATTGGCAGATTCACCTGATTGC             | 66.4 |
| C05 | TGGCAATTTTTAACGTCAGATGAAAACAATAACGGATTTCG    | 65.4 |
| C06 | AAGGAATTACAAAGAAACCACCAGTCAGATGA             | 61.3 |
| C07 | GGACATTCACCTCAAATATCAAACACAGTTGA             | 61.3 |
| C08 | TTGACGAGCACGTATACTGAAATGGATTATTTAATAAAAAG    | 63.3 |
| C09 | CCTGATTGCTTTGAATTGCGTAGATTTTCAGGCATCAATA     | 66.4 |
| C10 | TAATCCTGATTATCATTTTTGCGGAGAGGAAGG            | 62.6 |
| C11 | TTATCTAAAGCATCACCTTGCTGATGGCCAAC             | 63.9 |
| C12 | AGAGATAGTTTGACGCTCAATCGTACGTGCTTTTCCTCGTT    | 69.5 |
| C13 | GATTATACACAGAAATAAAGAAATACCAAGTTACAAAATC     | 61.3 |
| C14 | TAGGAGCATAAAAAGTTTGAGTAACATTGTTTG            | 58.7 |
| C15 | TGACCTGACAAATGAAAAATCTAAAATATCTT             | 56.2 |
| C16 | AGAATCAGAGCGGGAGATGGAATACCTACATAACCCTTC      | 69.5 |
| C17 | GCGCAGAGGCGAATTAATTATTTGCACGTAAATTCTGAAT     | 66.4 |

|     |                                              |      |
|-----|----------------------------------------------|------|
| C18 | AATGGAAGCGAACGTTATTAATTTCTAACAAC             | 58.7 |
| C19 | TAATAGATCGCTGAGAGCCAGCAGAAGCGTAA             | 65.1 |
| C20 | GAATACGTAACAGGAAAAACGCTCCTAAACAGGAGGCCGA     | 70.5 |
| C21 | TCAATAGATATTAATCCTTTGCCGGTTAGAACCT           | 62.2 |
| C22 | CAATATTTGCCTGCAACAGTGCCATAGAGCCG             | 66.4 |
| C23 | TTAAAGGGATTTTAGATACCGCCAGCCATTGCGGCACAGA     | 70.5 |
| C24 | ACAATTCGACAACCTCGTAATACAT                    | 51.0 |
| C25 | TTGAGGATGGTCAGTATTAACACCTTGAATGG             | 62.6 |
| C26 | CTATTAGTATATCCAGAACAATATCAGGAACGGTACGCCA     | 67.4 |
| C27 | CGCGAACTAAAACAGAGGTGAGGCTTAGAAGTATT          | 65.7 |
| C28 | GAATCCTGAGAAGTGTATCGGCCTTGCTGGTACTTTAATG     | 69.5 |
| C29 | ACCACCAGCAGAAGATGATAGCCC                     | 59.6 |
| C30 | TAAAACATTAGAAGAACTCAAACTTTTTATAATCAGTGAG     | 61.3 |
| C31 | GCCACCGAGTAAAAGAACATCACTTGCCTGAGCGCCATTA AAA | 71.5 |
| C32 | TCTTTGATTAGTAATAGTCTGTCCATCACGCAAATTAACCGTT  | 66.8 |
| C33 | CGCGTCTGATAGGAACGCCATCAACTTTTACA             | 65.1 |
| C34 | AGGAAGATGGGGACGACGACAGTAATCATATT             | 63.9 |
| C35 | CTCTAGAGCAAGCTTGCATGCCTGGTCAGTTG             | 67.7 |
| C36 | CCTTCACCGTGAGACGGGCAACAGCAGTCACA             | 70.3 |
| C37 | CGAGAAAGGAAGGGAAGCGTACTATGGTTGCT             | 66.4 |
| C38 | GCTCATTTTTTAACCAGCCTTCTGTAGCCAGGCATCTGC      | 71.5 |
| C39 | CAGTTTGACGCACTCCAGCCAGCTAAACGACG             | 69.0 |
| C40 | GCCAGTGCATCCCCGGGTACCGAGTTTTTCT              | 70.3 |
| C41 | TTTCACCAGCCTGGCCCTGAGAGAAAGCCGGCGAACGTGG     | 76.7 |
| C42 | GTAACCGTCTTTTCATCAACATTA AAAATTTTTGTAAATCA   | 61.3 |
| C43 | ACGTTGTATTCGGCACCGCTTCTGGCGCATC              | 70.3 |
| C44 | CCAGGGTGGCTCGAATTCGTAATCCAGTCACG             | 69.0 |
| C45 | TAGAGCTTGACGGGGAGTTGCAGCAAGCGGTCATTGGGCG     | 75.6 |
| C46 | GTTAAAATTCGCATTAATGTGAGCGAGTAACACACGTTGG     | 67.4 |
| C47 | TGTAGATGGGTGCCGAAACCAGGAACGCCAG              | 70.3 |
| C48 | GGTTTTCCATGGTCATAGCTGTTTGAGAGGCG             | 66.4 |
| C49 | GTTTGCCTCACGCTGGTTTGCCCCAAGGGAGCCCCCGATT     | 76.7 |
| C50 | GGATAGGTACCCGTCGGATTCTCCTAAACGTTAATATTTT     | 67.4 |
| C51 | AGTTGGGTCAAAGCGCCATTCGCCCCGTAATG             | 69.0 |
| C52 | CGCGCGGGCCTGTGTGAAATTGTTGGCGATTA             | 69.0 |
| C53 | CTAAATCGGAACCCTAAGCAGGCGAAAATCCTTCGGCCAA     | 71.5 |
| C54 | CGGCGGATTGAATTCAGGCTGCGCAACGGGGGATG          | 73.9 |
| C55 | TGCTGCAAATCCGCTCACAATTCAGCTGCA               | 67.7 |
| C56 | TTAATGAAGTTTTGATGGTGGTTCCGAGGTGCCGTAAAGCA    | 69.5 |
| C57 | TGGCGAAATGTTGGGAAGGGCGAT                     | 59.6 |

|          |                                             |      |
|----------|---------------------------------------------|------|
| C58      | TGTCGTGCACACAACATACGAGCCACGCCAGC            | 70.3 |
| C59      | CAAGTTTTTTGGGGTCGAAATCGGCAAAATCCGGGAAACC    | 70.5 |
| C60      | TCTTCGCTATTGGAAGCATAAAGTGTATGCCCGCT         | 66.9 |
| C61      | TTCCAGTCCTTATAAATCAAAGAGAACCATCACCCAAAT     | 65.4 |
| C62      | GCGCTCACAAAGCCTGGGGTGCCTA                   | 64.7 |
| C63      | CGATGGCCCACTACGTATAGCCCGAGATAGGGATTGCGTT    | 73.6 |
| C64      | AACTCACATTATTGAGTGTTGTTCCAGAAACCGTCTATCAGGG | 69.6 |
| C65      | ACGTGGACTCCAACGTCAAAGGGCGAATTTGGAACAAGAGTCC | 73.4 |
| Link-A1C | TTAATTAATTTTTTACCATATCAAA                   | 43.7 |
| Link-A2C | TTAATTTTCATCTTAGACTTTACAA                   | 45.9 |
| Link-A3C | CTGTCCAGACGTATACCGAACGA                     | 57.3 |
| Link-A4C | TCAAGATTAGTGTAGCAATACT                      | 47.3 |
| Link-B1A | TGTAGCATTCTTTTTATAAACAGTT                   | 50.2 |
| Link-B2A | TTTAATTGTATTTCCACCAGAGCC                    | 52.7 |
| Link-B3A | ACTACGAAGGCTTAGCACCATTA                     | 53.7 |
| Link-B4A | ATAAGGCTTGCAACAAAGTTAC                      | 49.2 |
| Link-C1B | GTGGGAACAAATTTCTATTTTTGAG                   | 51.9 |
| Link-C2B | CGGTGCGGGCCTTCCAAAAACATT                    | 59.6 |
| Link-C3B | ATGAGTGAGCTTTTAAATATGCA                     | 48.4 |
| Link-C4B | ACTATTAAGAGGATAGCGTCC                       | 51.0 |
| Loop     | GCGCTTAATGCGCCGCTACAGGGC                    | 64.7 |

**Table S2:** Bridge staple strands required to assemble the DNA rhombus.

| Name  | Sequence                                         | T <sub>M</sub><br>(°C) |
|-------|--------------------------------------------------|------------------------|
| B45-A | ACGAACTAACCGAACTGACCAACTCCTGATAA                 | 63.9                   |
| B53-A | GGACGTTGGAACGGTGTACAGACCGAAACAAA                 | 66.4                   |
| B59-A | CGATTTTATGACCTTCATCAAGAGCATCTTTG                 | 61.3                   |
| B63-A | TTTCAACTCGGATATTCATTACCCACGAAAGA                 | 61.3                   |
| B12-D | AACTCCAAGATTGCATCAAAAAGATAATGCAGATACATAATTAATAAA | 64.7                   |
| B20-D | TAATTGCTTTACCCTGACTATTATGAGGCATAGTAAGAGCACCAGTCA | 70.7                   |
| B26-D | CGGATGGCAGGAGAATGACCATAATCGTTTACCAGACGACACCTTATG | 74.1                   |
| B30-D | TGCTGTAGATCCCCCTCAAATGCTGCGAGAGGCTTTTGCATGGTTTAA | 74.1                   |

**Table S3:** Thiol-labeled DNA strands used for the functionalization of AuNR and AuNP.

| Name  | Sequence                           |
|-------|------------------------------------|
| A-seq | TTTTTTTTTTTTTTTTTAGCGA/3ThioMC3-D/ |
| Q-seq | GATTTCGATAGCTTATGCTGC/3ThioMC3-D/  |

**Table S4:** List of capture strands used for AuNR/AuNP attachment.

| Name                             | Modification | Sequence                                                     | T <sub>M</sub><br>(°C) |
|----------------------------------|--------------|--------------------------------------------------------------|------------------------|
| Complementary to A-seq-thiol DNA |              |                                                              |                        |
| <u>Side A</u>                    |              |                                                              |                        |
| AA04                             | Tri-Aseq-A04 | AAAAAAAAAAAAAAAAAATGGTTTATGTCACAATCAATAGATATTTAAAC           | 61.1                   |
| AA08                             | Tri-Aseq-A08 | AAAAAAAAAAAAAAAAAAGACGGGAGAATTAACCTCGGAATAAGTTTATTTCCAGCGCC  | 70.0                   |
| AA12                             | Tri-Aseq-A12 | AAAAAAAAAAAAAAAAAACATTCAACAAACGCAAAGACACCAGAACACCCTGAACAAA   | 69.3                   |
| AA16                             | Tri-Aseq-A16 | AAAAAAAAAAAAAAAAAAGTCAGAGGGTAATTGATGGCAACATATAAAAGCGATTGAG   | 68.6                   |
| AA20                             | Tri-Aseq-A20 | AAAAAAAAAAAAAAAAAATTGACGGAAATACATACATAAAAGGGCGCTAATATCAGAGA  | 67.8                   |
| AA23                             | Tri-Aseq-A23 | AAAAAAAAAAAAAAAAAAGATAACCCACAAGAATGTTAGCAAACGTAGAAAATTATTC   | 66.3                   |
| AA26                             | Tri-Aseq-A26 | AAAAAAAAAAAAAAAAAACACCGTCACCTTATTACGCAGTATTGAGTTAAGCCCAATA   | 69.3                   |
| AA28                             | Tri-Aseq-A28 | AAAAAAAAAAAAAAAAAATAAGAGCAAGAAACATGGCATGATTAAGACTCCGACTTG    | 68.6                   |
| AA30                             | Tri-Aseq-A30 | AAAAAAAAAAAAAAAAAAGAGCCAGCGAATACCCAAAAGAACATGAAATAGCAATAGC   | 69.3                   |
| AA31                             | Tri-Aseq-A31 | AAAAAAAAAAAAAAAAATATCTTACCGAAGCCCAAACGCAATAATAACGAAAATCACCAG | 69.4                   |
| AA37                             | Tri-Aseq-A37 | AAAAAAAAAAAAAAAAAAGAGAATAACATAAAAAACAGGGAAGCGCATT            | 63.7                   |
| AA41                             | Tri-Aseq-A41 | AAAAAAAAAAAAAAAAAATTTCTTAGCACTCATCGAGAACAATAGCAGCCTTTACAG    | 69.3                   |
| AA45                             | Tri-Aseq-A45 | AAAAAAAAAAAAAAAAAACGTCAAAAATGAAAAGCAAGCCGTTTTTATGAAACCAA     | 66.3                   |
| AA49                             | Tri-Aseq-A49 | AAAAAAAAAAAAAAAAAAGCATGTATTTTCATCGTAGGAATCAAACGATTTTTTTGTTT  | 65.6                   |
| AA53                             | Tri-Aseq-A53 | AAAAAAAAAAAAAAAAAATCCCAATCCAAATAAGATTACCGCGCCCAATAAATAATAT   | 67.1                   |
| AA56                             | Tri-Aseq-A56 | AAAAAAAAAAAAAAAAACAAGAAAGCAAGCAAATCAGATAACAGCCATATTATTTA     | 65.6                   |
| AA59                             | Tri-Aseq-A59 | AAAAAAAAAAAAAAAAAAGCCAGTTACAAAATAATAGAAGGCTTATCCGGTTATCAAC   | 67.8                   |
| AA61                             | Tri-Aseq-A61 | AAAAAAAAAAAAAAAAAAGCGCCTGTTATTCTAAGAACGCGATTCCAGAGCCTAATTT   | 70.0                   |
| AA62                             | Tri-Aseq-A62 | AAAAAAAAAAAAAAAAATCAGCTAAAAAAGGTAAAGTAATT                    | 56.8                   |
| AA63                             | Tri-Aseq-A63 | AAAAAAAAAAAAAAAAACGCTAACGAGCGTCTGGCGTTTTAGCGAACCCAACATGT     | 72.3                   |
| <u>Side B</u>                    |              |                                                              |                        |
| AB04                             | Tri-Aseq-B04 | AAAAAAAAAAAAAAAAAATTCGAGCTAAGACTTCAAATATCGGGAACGAG           | 66.3                   |
| AB12                             | Tri-Aseq-B12 | AAAAAAAAAAAAAAAAAACTCCAAGATTGCATCAAAAAGATAATGCAGATACATAA     | 65.6                   |
| AB20                             | Tri-Aseq-B20 | AAAAAAAAAAAAAAAAAATAATTGCTTTACCCTGACTATTATGAGGCATAGTAAGAGC   | 67.8                   |
| AB26                             | Tri-Aseq-B26 | AAAAAAAAAAAAAAAAACGGATGGCACGAGAATGACCATAATCGTTTACCAGACGAC    | 71.5                   |
| AB30                             | Tri-Aseq-B30 | AAAAAAAAAAAAAAAAAATGCTGTAGATCCCCCTCAAATGCTGCGAGAGGCTTTTGCA   | 72.3                   |
| AB41                             | Tri-Aseq-B41 | AAAAAAAAAAAAAAAAACGACCTGCGGTCAATCATAAGGGAACGGAACAACATTATT    | 70.0                   |
| AB49                             | Tri-Aseq-B49 | AAAAAAAAAAAAAAAAATATCATCGTTGAAAGAGGACAGATGGAAGAAAAATCTACG    | 67.8                   |
| AB56                             | Tri-Aseq-B56 | AAAAAAAAAAAAAAAAACCAAGCGCAGGCGCATAGGCTGGCAGAACTGGCTCATTAT    | 73.8                   |
| AB61                             | Tri-Aseq-B61 | AAAAAAAAAAAAAAAAAAAAAACTTAATCTTGACAAGAACTTAATCATTGTGAATT     | 64.1                   |
| AB62                             | Tri-Aseq-B62 | AAAAAAAAAAAAAAAAAAGCAAAGTAAATACGTAATGCC                      | 60.0                   |
| <u>Side C</u>                    |              |                                                              |                        |



|                                         |              |                                                             |      |
|-----------------------------------------|--------------|-------------------------------------------------------------|------|
| AC04                                    | Tri-Aseq-C04 | AAAAAAAAAAAAAAAAACGACCAGTACATTGGCAGATTCACCTGATTGC           | 68.0 |
| AC12                                    | Tri-Aseq-C12 | AAAAAAAAAAAAAAAAAAGAGATAGTTTTGACGCTCAATCGTACGTGCTTTTCCTCGTT | 70.0 |
| AC20                                    | Tri-Aseq-C20 | AAAAAAAAAAAAAAAAAGAATACGTAACAGGAAAAACGCTCCTAAACAGGAGGCCGA   | 70.8 |
| AC26                                    | Tri-Aseq-C26 | AAAAAAAAAAAAAAAAACTATTAGTATATCCAGAACAATATCAGGAACGGTACGCCA   | 68.6 |
| AC30                                    | Tri-Aseq-C30 | AAAAAAAAAAAAAAAAATAAAACATTAGAAGAACTCAAACTTTTTATAATCAGTGAG   | 64.1 |
| AC41                                    | Tri-Aseq-C41 | AAAAAAAAAAAAAAAAATTTACCAGCCTGGCCCTGAGAGAAAGCCGGCGAACGTGG    | 75.3 |
| AC49                                    | Tri-Aseq-C49 | AAAAAAAAAAAAAAAAATTGTTTGCCTCACGCTGGTTTGCCCCAAGGGAGCCCCCGATT | 75.1 |
| AC56                                    | Tri-Aseq-C56 | AAAAAAAAAAAAAAAAATTTAATGAAGTTTGATGGTGGTTCCGAGGTGCCGTAAAGCA  | 70.1 |
| AC61                                    | Tri-Aseq-C61 | AAAAAAAAAAAAAAAAATTCAGTCCTTATAAATCAAAAGAGAACCATCACCCAAAT    | 67.1 |
| AC62                                    | Tri-Aseq-C62 | AAAAAAAAAAAAAAAAAAGCGCTCACAAGCCTGGGGTGCCTA                  | 67.3 |
|                                         |              |                                                             |      |
| <u>Complementary to Q-seq-thiol DNA</u> |              |                                                             |      |
| QA04                                    | Tri-Qseq-A04 | ATAAGCTATCGAATCATGGTTTATGTACAATCAATAGATATTTAAAC             | 65.4 |
| QA08                                    | Tri-Qseq-A08 | ATAAGCTATCGAATCGACGGGAGAATTAACCTCGGAATAAGTTTATTTCCAGCGCC    | 73.8 |
| QA36                                    | Tri-Qseq-A36 | ATAAGCTATCGAATCCAAGTACCTCATTTCCAAGAACGGGAAATTCAT            | 69.8 |
| QA37                                    | Tri-Qseq-A37 | ATAAGCTATCGAATCAGAGAATAACATAAAAAACAGGGAAGCGCATTA            | 68.0 |

**Table S5:** Ratio of AuNR/AuNP to DNA origami template.

| Arrangement        | AuNR   | AuNP |
|--------------------|--------|------|
| End-to-end         | 10-20X |      |
| Rod-particle-rod   | 10-20X | 20X  |
| Inverted-V         | 20X    |      |
| Three-rod-triangle | 30X    |      |
| Diamond            | 20X    |      |

**Table S6:** Capture strand positions corresponding to each AuNR configuration.

| Configuration             | AuNR Length | Thiol-sequence | Capture strand positions                                                                                                                                                           |
|---------------------------|-------------|----------------|------------------------------------------------------------------------------------------------------------------------------------------------------------------------------------|
| <b>ETE</b>                | 40 nm       | A seq          | AA08, AA16, AA23, AA28, AA37, AA45, AA53, AA59                                                                                                                                     |
| <b>RPR</b>                | 40 nm       | A seq, Q seq   | AQ04, AQ08, AA16, AA23, AA28, AA31, AQ36, AQ37, AA45, AA53, AA59, AA63                                                                                                             |
| <b>Inverted-V</b>         | 90 nm       | A seq          | AA04, AA12, AA20, AA26, AA30, AA41, AA49, AA56, AA61, AA62, AC04, AC12, AC20, AC26, AC30, AC41, AC49, AC56, AC61, AC62                                                             |
| <b>Three-rod-triangle</b> | 90 nm       | A seq          | AA04, AA12, AA20, AA26, AA30, AA41, AA49, AA56, AA61, AA62, AC04, AC12, AC20, AC26, AC30, AC41, AC49, AC56, AC61, AC62, AB04, AB12, AB20, AB26, AB30, AB41, AB49, AB56, AB61, AB62 |
| <b>Diamond</b>            | 90 nm       | A seq          | AA04, AA12, AA20, AA26, AA30, AA41, AA49, AA56, AA61, AA62, AC04, AC12, AC20, AC26, AC30, AC41, AC49, AC56, AC61, AC62                                                             |

## References

1. P. W. K. Rothmund, *Nature*, 2006, **440**, 297-302.
2. S. M. Douglas, A. H. Marblestone, S. Teerapittayanon, A. Vazquez, G. M. Church and W. M. Shih, *Nucleic Acids Res.*, 2009, **37**, 5001-5006.
3. E. Oh, D. Lee, Y. P. Kim, S. Y. Cha, D. B. Oh, H. A. Kang, J. Kim and H. S. Kim, *Angew. Chem., Int. Ed.*, 2006, **45**, 7959-7963.
4. E. Oh, K. Susumu, R. Goswami and H. J. L. Mattoussi, *Langmuir*, 2010, **26**, 7604-7613.
5. K. Susumu, E. Oh, J. B. Delehanty, J. B. Blanco-Canosa, B. J. Johnson, V. Jain, W. J. Hervey IV, W. R. Algar, K. Boeneman and P. E. Dawson, *J. Am. Chem. Soc.*, 2011, **133**, 9480-9496.
6. E. Oh, J. B. Delehanty, K. E. Sapsford, K. Susumu, R. Goswami, J. B. Blanco-Canosa, P. E. Dawson, J. Granek, M. Shoff and Q. J. A. n. Zhang, *ACS Nano*, 2011, **5**, 6434-6448.
7. J. Fontana, R. Nita, N. Charipar, J. Naciri, K. Park, A. Dunkelberger, J. Owrutsky, A. Piqué, R. Vaia and B. Ratna, *Adv. Opt. Mater.*, 2017, **5**, 1700335.
8. H. Jia, C. Fang, X.-M. Zhu, Q. Ruan, Y.-X. J. Wang and J. J. L. Wang, *Langmuir*, 2015, **31**, 7418-7426.
9. X. Zhang, M. R. Servos and J. Liu, *J. Am. Chem. Soc.*, 2012, **134**, 7266-7269.
10. A. D. Rakić, A. B. Djurišić, J. M. Elazar and M. L. Majewski, *Appl. Opt.*, 1998, **37**, 5271-5283.
